# Supplementary material for: Designing of a Multi-epitope Vaccine against the Structural Proteins of Marburg Virus Exploiting the Immunoinformatics Approach
Source: PubMed Central journal article supplement — ACS Omega. 2021 Nov 18;6(47):32043–71. doi: 10.1021/acsomega.1c04817 (PMC8638006; doi:10.1021/acsomega.1c04817), 2021-11-18
Supplement: ao1c04817_si_001.pdf [file ao1c04817_si_001.pdf]

## Supporting Information

### Designing of Multi-Epitope Vaccine against the Structural Proteins of Marburg Virus Exploiting the Immunoinformatics Approach

Saad Ahmed Sami, <sup>a</sup> Kay Kay Shain Marma, <sup>a</sup> Shafi Mahmud, <sup>b</sup> Md. Asif Nadim Khan, <sup>c</sup> Sarah Albogami, <sup>d</sup> Ahmed M. El-Shehawi, <sup>d</sup> Ahmed Rakib, <sup>a</sup> Agnila Chakraborty, <sup>a</sup> Mostafah Mohiuddin, <sup>a</sup> Kuldeep Dhama, <sup>e</sup> Mir Muhammad Nasir Uddin, <sup>a</sup> Mohammed Kamrul Hossain, <sup>a</sup> Trina Ekawati Tallei, <sup>f</sup> Talha Bin Emran, <sup>\*g</sup>

<sup>a</sup>Department of Pharmacy, Faculty of Biological Sciences, University of Chittagong, Chittagong 4331, Bangladesh

<sup>b</sup>Microbiology Laboratory, Bioinformatics Division, Department of Genetic Engineering and Biotechnology, University of Rajshahi, Rajshahi 6205, Bangladesh

<sup>c</sup>Department of Biochemistry and Molecular Biology, Faculty of Biological Sciences, University of Chittagong, Chittagong 4331, Bangladesh

<sup>d</sup>Department of Biotechnology, College of Science, Taif University, P.O. Box 11099, Taif 21944, Saudi Arabia

<sup>e</sup>Division of Pathology, ICAR-Indian Veterinary Research Institute, Izatnagar, Bareilly, Uttar Pradesh 243122, India

<sup>f</sup>Department of Biology, Faculty of Mathematics and Natural Sciences, Sam Ratulangi University, Manado, North Sulawesi 95115, Indonesia

<sup>g</sup>Department of Pharmacy, BGC Trust University Bangladesh, Chittagong 4381, Bangladesh

**Running title:** Multi-epitope vaccine design against MARV.

## Table Legends

**Table S1:** Prediction of potential CTL epitopes from MARV structural proteins.

**Table S2:** Prediction of potential HTL epitopes from MARV structural proteins.

**Table S3:** Prediction of potential LBL epitopes from MARV structural proteins.

**Table S4:** Worldwide population coverage analysis based on MHC restriction data.

**Table S5:** Refined vaccine models generated by GalaxyRefine server.

**Table S6:** List of amino acid residues in disulfide engineering.

## Figure Legends

**Figure S1:** Population coverage analysis of the shortlisted epitopes based on combined MHCI and MHCII restriction data for (A) Central Africa, (B) Central America, (C) East Africa, (D) East Asia, (E) Europe, (F) North Africa, (G) North America, (H) Northeast Asia, (I) Oceania, (J) South Africa, (K) South America, (L) South Asia, (M) Southeast Asia, (N) Southwest Asia, (O) West Africa, (P) West Indies, and (Q) World- using the IEDB analysis resource.

**Figure S2:** Population coverage analysis of the shortlisted epitopes based on MHCI restriction data for (A) Central Africa, (B) Central America, (C) East Africa, (D) East Asia, (E) Europe, (F) North Africa, (G) North America, (H) Northeast Asia, (I) Oceania, (J) South Africa, (K) South America, (L) South Asia, (M) Southeast Asia, (N) Southwest Asia, (O) West Africa, (P) West Indies, and (Q) World- using the IEDB analysis resource.

**Figure S3:** Population coverage analysis of the shortlisted epitopes based on MHCII restriction data for (A) Central Africa, (B) Central America, (C) East Africa, (D) East Asia, (E) Europe, (F) North Africa, (G) North America, (H) Northeast Asia, (I) Oceania, (J) South Africa, (K) South America, (L) South Asia, (M) Southeast Asia, (N) Southwest Asia, (O) West Africa, (P) West Indies, and (Q) World- using the IEDB analysis resource.

**Figure S4:** (A) Solubility prediction of the vaccine protein by Protein-Sol server, (B) Composition of the secondary structure from amino acid residues of vaccine construct; (C) Predicted secondary structure of vaccine construct by SOPMA server, (D) Predicted secondary structure of vaccine construct by PSIPRED server, and (E) Predicted cart of the vaccine construct by PSIPRED server.

**Figure S5:** (A) 3D structure of the pre-refined vaccine construct, (B) Z-score of the pre-refined vaccine construct predicted by PROSA server, and (C) Ramachandran plot analysis of the pre-refined vaccine construct.

**Table S1:** Prediction of potential CTL epitopes from MARV structural proteins.

| <b>Epitopes</b> | <b>Protein</b> | <b>C-score</b> | <b>Immunogenicity</b> | <b>Antigenicity</b>       | <b>Allergenicity</b>  | <b>Toxicity</b> |
|-----------------|----------------|----------------|-----------------------|---------------------------|-----------------------|-----------------|
| GSNDTELNY       | L              | 2.1551         | Positive              | 1.1545 (Probable Antigen) | Probable Non-Allergen | Non-Toxin       |
| VSDIGSYDF       | L              | 1.6327         | Positive              | 1.0808 (Probable Antigen) | Probable Non-Allergen | Non-Toxin       |
| WTIGNRAPY       | L              | 2.4674         | Positive              | 1.2809 (Probable Antigen) | Probable Non-Allergen | Non-Toxin       |
| LSDLTFLIS       | L              | 1.1007         | Positive              | 0.8669 (Probable Antigen) | Probable Non-Allergen | Non-Toxin       |
| SKSTRTNHY       | L              | 1.0416         | Positive              | 1.0094 (Probable Antigen) | Probable Non-Allergen | Non-Toxin       |
| FSLNQILEF       | L              | 0.9996         | Positive              | 0.4090 (Probable Antigen) | Probable Non-Allergen | Non-Toxin       |
| RLAWTIGNR       | L              | 1.4083         | Positive              | 1.7779 (Probable Antigen) | Probable Non-Allergen | Non-Toxin       |
| KLDFIRNTK       | L              | 1.3402         | Positive              | 0.4576 (Probable Antigen) | Probable Non-Allergen | Non-Toxin       |
| HSGFIYFGK       | L              | 1.3375         | Positive              | 0.9309 (Probable Antigen) | Probable Non-Allergen | Non-Toxin       |
| GLSFLNPEK       | L              | 1.2918         | Positive              | 1.2577 (Probable Antigen) | Probable Non-Allergen | Non-Toxin       |
| ITFLRQTVR       | L              | 1.1636         | Positive              | 0.8009 (Probable Antigen) | Probable Non-Allergen | Non-Toxin       |
| AMYLEDGFK       | L              | 1.1434         | Positive              | 0.4738 (Probable Antigen) | Probable Non-Allergen | Non-Toxin       |
| QTHGIFTPR       | L              | 1.0421         | Positive              | 1.0543 (Probable Antigen) | Probable Non-Allergen | Non-Toxin       |
| NLSDLTFLI       | L              | 1.4496         | Positive              | 1.3604 (Probable Antigen) | Probable Non-Allergen | Non-Toxin       |
| YILFFPFGL       | L              | 1.3987         | Positive              | 1.1863 (Probable Antigen) | Probable Non-Allergen | Non-Toxin       |
| FLTGLFPSL       | L              | 1.3538         | Positive              | 1.3390 (Probable Antigen) | Probable Non-Allergen | Non-Toxin       |
| AVLDIALSL       | L              | 1.2005         | Positive              | 1.1816 (Probable Antigen) | Probable Non-Allergen | Non-Toxin       |
| LLDLRNHFI       | L              | 1.0733         | Positive              | 1.3264 (Probable Antigen) | Probable Non-Allergen | Non-Toxin       |
| FIKDRLTAV       | L              | 2.0044         | Positive              | 0.4056 (Probable Antigen) | Probable Non-Allergen | Non-Toxin       |
| DYQTVLNFL       | L              | 1.7646         | Positive              | 0.4813 (Probable Antigen) | Probable Non-Allergen | Non-Toxin       |
| KWKETDYLF       | L              | 1.7160         | Positive              | 1.7331 (Probable Antigen) | Probable Non-Allergen | Non-Toxin       |
| LFDWMHFLI       | L              | 1.5525         | Positive              | 0.9236 (Probable Antigen) | Probable Non-Allergen | Non-Toxin       |
| PYYWGMLLL       | L              | 1.4739         | Positive              | 1.2659 (Probable Antigen) | Probable Non-Allergen | Non-Toxin       |

|           |   |        |          |                           |                       |           |
|-----------|---|--------|----------|---------------------------|-----------------------|-----------|
| AYHYHLGGI | L | 1.1865 | Positive | 1.2504 (Probable Antigen) | Probable Non-Allergen | Non-Toxin |
| WYFVEHEPL | L | 1.0715 | Positive | 0.6006 (Probable Antigen) | Probable Non-Allergen | Non-Toxin |
| DYQENAEAL | L | 1.0288 | Positive | 0.7567 (Probable Antigen) | Probable Non-Allergen | Non-Toxin |
| LFGIADFVI | L | 0.9705 | Positive | 0.6666 (Probable Antigen) | Probable Non-Allergen | Non-Toxin |
| VMFETFCVF | L | 0.9107 | Positive | 0.5222 (Probable Antigen) | Probable Non-Allergen | Non-Toxin |
| NTINLGVAV | L | 1.0689 | Positive | 1.0081 (Probable Antigen) | Probable Non-Allergen | Non-Toxin |
| LTTEGTMLM | L | 1.0094 | Positive | 0.4855 (Probable Antigen) | Probable Non-Allergen | Non-Toxin |
| FPTIAAWTL | L | 1.3265 | Positive | 0.4624 (Probable Antigen) | Probable Non-Allergen | Non-Toxin |
| LLESRRLIL | L | 1.3330 | Positive | 0.4461 (Probable Antigen) | Probable Non-Allergen | Non-Toxin |
| IGYILFFPF | L | 1.0239 | Positive | 0.9160 (Probable Antigen) | Probable Non-Allergen | Non-Toxin |
| NPLWLDSVI | L | 0.9757 | Positive | 0.5009 (Probable Antigen) | Probable Non-Allergen | Non-Toxin |
| YRVRNVQTL | L | 1.5886 | Positive | 0.8591 (Probable Antigen) | Probable Non-Allergen | Non-Toxin |
| SRTEDKIGY | L | 1.2665 | Positive | 1.3539 (Probable Antigen) | Probable Non-Allergen | Non-Toxin |
| GRLGRVSRS | L | 1.0638 | Positive | 1.4659 (Probable Antigen) | Probable Non-Allergen | Non-Toxin |
| ARVAVELAI | L | 1.0520 | Positive | 0.5899 (Probable Antigen) | Probable Non-Allergen | Non-Toxin |
| HRYTIPFSE | L | 1.0433 | Positive | 0.4203 (Probable Antigen) | Probable Non-Allergen | Non-Toxin |
| NRAPYIGSR | L | 0.9854 | Positive | 1.4659 (Probable Antigen) | Probable Non-Allergen | Non-Toxin |
| YHLGGIEGL | L | 2.1229 | Positive | 0.6739 (Probable Antigen) | Probable Non-Allergen | Non-Toxin |
| AHHIPLISL | L | 1.3198 | Positive | 0.9102 (Probable Antigen) | Probable Non-Allergen | Non-Toxin |
| HSMLAINLL | L | 1.2105 | Positive | 0.7670 (Probable Antigen) | Probable Non-Allergen | Non-Toxin |
| LDYEGTLFL | L | 1.0483 | Positive | 0.4798 (Probable Antigen) | Probable Non-Allergen | Non-Toxin |
| TEINARTRL | L | 1.4761 | Positive | 1.0369 (Probable Antigen) | Probable Non-Allergen | Non-Toxin |
| EETFVHSGF | L | 1.3617 | Positive | 0.5915 (Probable Antigen) | Probable Non-Allergen | Non-Toxin |
| KSLDAHEDF | L | 1.7702 | Positive | 0.5138 (Probable Antigen) | Probable Non-Allergen | Non-Toxin |
| GTSETRHIF | L | 1.0955 | Positive | 0.9338 (Probable Antigen) | Probable Non-Allergen | Non-Toxin |

|            |      |        |          |                            |                       |           |
|------------|------|--------|----------|----------------------------|-----------------------|-----------|
| IALITPQVL  | L    | 0.9240 | Positive | 0.4927 (Probable Antigen)  | Probable Non-Allergen | Non-Toxin |
| ILFFPFGLF  | L    | 1.2137 | Positive | 0.7465 (Probable Antigen)  | Probable Non-Allergen | Non-Toxin |
| YNLAFRYEF  | L    | 0.9388 | Positive | 1.4719 (Probable Antigen)  | Probable Non-Allergen | Non-Toxin |
| TFVHSGFIY  | L    | 0.9217 | Positive | 0.5086 (Probable Antigen)  | Probable Non-Allergen | Non-Toxin |
| QLSAIALGV  | NP   | 1.1273 | Positive | 1.4299 (Probable Antigen)  | Probable Non-Allergen | Non-Toxin |
| RFSGLLIVK  | NP   | 1.0456 | Positive | 0.9051(Probable Antigen)   | Probable Non-Allergen | Non-Toxin |
| HSLLELGTK  | NP   | 0.9581 | Positive | 1.0804 (Probable Antigen)  | Probable Non-Allergen | Non-Toxin |
| RPMNRPTAL  | NP   | 1.9018 | Positive | 0.5629 (Probable Antigen)  | Probable Non-Allergen | Non-Toxin |
| RPTALPPPV  | NP   | 1.4121 | Positive | 0.9853 (Probable Antigen)  | Probable Non-Allergen | Non-Toxin |
| APFARVLNL  | NP   | 1.3083 | Positive | 0.6130 (Probable Antigen)  | Probable Non-Allergen | Non-Toxin |
| TPVEVTVQA  | NP   | 0.9951 | Positive | 1.1606 (Probable Antigen)  | Probable Non-Allergen | Non-Toxin |
| FDERRHVAM  | NP   | 2.2254 | Positive | 0.9841 (Probable Antigen)  | Probable Non-Allergen | Non-Toxin |
| HMKVIFGIL  | NP   | 1.5964 | Positive | 0.7118 (Probable Antigen)  | Probable Non-Allergen | Non-Toxin |
| YLRDAGYEF  | NP   | 1.0941 | Positive | 0.5322 (Probable Antigen)  | Probable Non-Allergen | Non-Toxin |
| QRGRIGLFL  | NP   | 1.0594 | Positive | 1.1352 (Probable Antigen)  | Probable Non-Allergen | Non-Toxin |
| TRMREAYEL  | NP   | 0.9866 | Positive | 0.6250 (Probable Antigen)  | Probable Non-Allergen | Non-Toxin |
| RRHEHQEIQ  | NP   | 0.9027 | Positive | 0.6028 (Probable Antigen)  | Probable Non-Allergen | Non-Toxin |
| HEHQEIQAI  | NP   | 1.3818 | Positive | 0.7094 (Probable Antigen)  | Probable Non-Allergen | Non-Toxin |
| LTLCVEHYYY | NP   | 1.0758 | Positive | 0.4200 (Probable Antigen)  | Probable Non-Allergen | Non-Toxin |
| SQRGRIGLF  | NP   | 1.4682 | Positive | 1.2966 (Probable Antigen)  | Probable Non-Allergen | Non-Toxin |
| SNLARHGEY  | NP   | 0.9614 | Positive | 0.4514 (Probable Antigen)  | Probable Non-Allergen | Non-Toxin |
| FTYNLTNLV  | VP40 | 1.2927 | Positive | 0.7288 (Probable Antigen)  | Probable Non-Allergen | Non-Toxin |
| FTLEAIDI   | VP40 | 1.1872 | Positive | 0.7009 ( Probable Antigen) | Probable Non-Allergen | Non-Toxin |
| TQFTHNGQK  | VP40 | 1.2120 | Positive | 0.6418 (Probable Antigen)  | Probable Non-Allergen | Non-Toxin |
| TYNLTNLVL  | VP40 | 1.2456 | Positive | 0.9020 (Probable Antigen)  | Probable Non-Allergen | Non-Toxin |

|           |      |        |          |                            |                       |           |
|-----------|------|--------|----------|----------------------------|-----------------------|-----------|
| VPAWLPLGI | VP40 | 1.1069 | Positive | 1.3515 (Probable Antigen)  | Probable Non-Allergen | Non-Toxin |
| KGVPAWLPL | VP40 | 0.9815 | Positive | 0.6144 ( Probable Antigen) | Probable Non-Allergen | Non-Toxin |
| FGLVAEAVL | VP24 | 1.0630 | Positive | 0.8115 (Probable Antigen)  | Probable Non-Allergen | Non-Toxin |
| LALRILLGV | VP24 | 0.9151 | Positive | 0.6567 (Probable Antigen)  | Probable Non-Allergen | Non-Toxin |
| EPFLALRIL | VP24 | 0.9280 | Positive | 0.7859 (Probable Antigen)  | Probable Non-Allergen | Non-Toxin |
| IEPFLALRI | VP24 | 1.0258 | Positive | 0.9800 (Probable Antigen)  | Probable Non-Allergen | Non-Toxin |
| SESVVFLV  | VP24 | 1.1188 | Positive | 0.9092 (Probable Antigen)  | Probable Non-Allergen | Non-Toxin |
| SLIPGFRSI | VP24 | 0.9134 | Positive | 0.9273 (Probable Antigen)  | Probable Non-Allergen | Non-Toxin |
| SPNLLGIYL | VP24 | 1.3490 | Positive | 0.8416 (Probable Antigen)  | Probable Non-Allergen | Non-Toxin |
| RILLGVALK | VP24 | 1.5364 | Positive | 0.8602 (Probable Antigen)  | Probable Non-Allergen | Non-Toxin |
| ISPNLLGIY | VP24 | 1.4959 | Positive | 1.0528 (Probable Antigen)  | Probable Non-Allergen | Non-Toxin |
| GMTLLHHLK | VP24 | 1.2605 | Positive | 0.7035 (Probable Antigen)  | Probable Non-Allergen | Non-Toxin |
| KQTYTGIHL | VP30 | 1.0350 | Positive | 1.5006 (Probable Antigen)  | Probable Non-Allergen | Non-Toxin |
| SLTCAGIRK | VP30 | 1.1697 | Positive | 1.3530 (Probable Antigen)  | Probable Non-Allergen | Non-Toxin |
| LTNRELLL  | VP30 | 0.9198 | Positive | 1.1351 (Probable Antigen)  | Probable Non-Allergen | Non-Toxin |
| TSLRAALSL | VP30 | 0.9648 | Positive | 0.6448 (Probable Antigen)  | Probable Non-Allergen | Non-Toxin |
| KLDETSRA  | VP30 | 1.0367 | Positive | 0.8875 (Probable Antigen)  | Probable Non-Allergen | Non-Toxin |
| RQLHEITPV | VP35 | 1.0145 | Positive | 0.9367 (Probable Antigen)  | Probable Non-Allergen | Non-Toxin |
| IDKGWVCVY | VP35 | 0.9677 | Positive | 0.6472 (Probable Antigen)  | Probable Non-Allergen | Non-Toxin |
| RTTAPAAAF | VP35 | 1.4688 | Positive | 0.4463 (Probable Antigen)  | Probable Non-Allergen | Non-Toxin |
| RVTTEERTF | GP   | 0.9125 | Positive | 0.4840 (Probable Antigen)  | Probable Non-Allergen | Non-Toxin |
| LTRWGGTCK | GP   | 1.1161 | Positive | 0.5523 (Probable Antigen)  | Probable Non-Allergen | Non-Toxin |
| NRHAIDFLL | GP   | 0.9118 | Positive | 0.6969 (Probable Antigen)  | Probable Non-Allergen | Non-Toxin |
| FGPGIEGLY | GP   | 0.9423 | Positive | 0.9714 (Probable Antigen)  | Probable Non-Allergen | Non-Toxin |
| LSIAVLIAL | GP   | 1.0233 | Positive | 0.8765 (Probable Antigen)  | Probable Non-Allergen | Non-Toxin |

|           |    |        |          |                           |                       |           |
|-----------|----|--------|----------|---------------------------|-----------------------|-----------|
| LINRHAI   | GP | 0.9208 | Positive | 0.6824 (Probable Antigen) | Probable Non-Allergen | Non-Toxin |
| FSLINRHAI | GP | 0.9750 | Positive | 0.8741 (Probable Antigen) | Probable Non-Allergen | Non-Toxin |
| AAGLSWIPF | GP | 0.9285 | Positive | 1.4744 (Probable Antigen) | Probable Non-Allergen | Non-Toxin |
| LQKTEDVHL | GP | 0.9366 | Positive | 1.2755 (Probable Antigen) | Probable Non-Allergen | Non-Toxin |
| APSITTLPP | GP | 1.0374 | Positive | 0.7789 (Probable Antigen) | Probable Non-Allergen | Non-Toxin |
| MPPHNTTTI | GP | 1.5292 | Positive | 0.7285 (Probable Antigen) | Probable Non-Allergen | Non-Toxin |
| QEDDLAAGL | GP | 1.5205 | Positive | 1.2182 (Probable Antigen) | Probable Non-Allergen | Non-Toxin |
| NPHAQGIAL | GP | 1.5028 | Positive | 1.0162 (Probable Antigen) | Probable Non-allergen | Non-Toxin |
| KSLELLLRV | GP | 0.9784 | Positive | 0.8474 (Probable Antigen) | Probable Non-Allergen | Non-Toxin |
| NENDCDAEL | GP | 1.2931 | Positive | 0.4489 (Probable Antigen) | Probable Non-Allergen | Non-Toxin |
| RRKRSILWR | GP | 1.3644 | Positive | 0.6080 (Probable Antigen) | Probable Non-Allergen | Non-Toxin |
| CFLISLILI | GP | 1.1048 | Positive | 1.1174 (Probable Antigen) | Probable Non-Allergen | Non-Toxin |
| TQTNDTGCF | GP | 1.2642 | Positive | 0.9573 (Probable Antigen) | Probable Non-Allergen | Non-Toxin |
| NIAAMIVNK | GP | 1.1055 | Positive | 0.6257 (Probable Antigen) | Probable Non-Allergen | Non-Toxin |
| TGWGLGGKW | GP | 0.9502 | Positive | 1.4104 (Probable Antigen) | Probable Non-Allergen | Non-Toxin |
| LLLSIAVLI | GP | 1.2015 | Positive | 0.4430 (Probable Antigen) | Probable Non-Allergen | Non-Toxin |
| LLLSIAVL  | GP | 0.9613 | Positive | 0.7352 (Probable Antigen) | Probable Non-Allergen | Non-Toxin |



**Table S2:** Prediction of potential HTL epitopes from MARV structural proteins.

| Epitopes        | Protein | Antigenicity                 | Allergenicity         | Toxicity  | IFN      | IL-4        | IL-10       |
|-----------------|---------|------------------------------|-----------------------|-----------|----------|-------------|-------------|
| FILKFVLIHQGVNLV | NP      | 0.6203<br>(Probable Antigen) | Probable Non-Allergen | Non-Toxin | Negative | Inducer     | Inducer     |
| LRSSFILKFVLIHQG | NP      | 0.6923<br>(Probable Antigen) | Probable Non-Allergen | Non-Toxin | Negative | Inducer     | Inducer     |
| RSSFILKFVLIHQGV | NP      | 0.6354<br>(Probable Antigen) | Probable Non-Allergen | Non-Toxin | Negative | Inducer     | Inducer     |
| SFILKFVLIHQGVNL | NP      | 0.6155<br>(Probable Antigen) | Probable Non-Allergen | Non-Toxin | Negative | Inducer     | Inducer     |
| SSFILKFVLIHQGVN | NP      | 0.4283<br>(Probable Antigen) | Probable Non-Allergen | Non-Toxin | Negative | Inducer     | Inducer     |
| NKKVILFDTNHQVSI | NP      | 0.7278<br>(Probable Antigen) | Probable Non-Allergen | Non-Toxin | Negative | Inducer     | Non-Inducer |
| RNKKVILFDTNHQVS | NP      | 0.8340<br>(Probable Antigen) | Probable Non-Allergen | Non-Toxin | Negative | Inducer     | Non-Inducer |
| VILFDTNHQVSICNQ | NP      | 0.4400<br>(Probable Antigen) | Probable Non-Allergen | Non-Toxin | Negative | Non-Inducer | Non-Inducer |
| VRNKKVILFDTNHQV | NP      | 0.8619<br>(Probable Antigen) | Probable Non-Allergen | Non-Toxin | Negative | Inducer     | Non-Inducer |
| SPLILALKTLESTES | NP      | 0.9457<br>(Probable Antigen) | Probable Non-Allergen | Non-Toxin | Negative | Non-Inducer | Inducer     |
| RGRIGLFLSFCSLFL | NP      | 0.4471<br>(Probable Antigen) | Probable Non-Allergen | Non-Toxin | Positive | Non-Inducer | Inducer     |
| FSGLLIVKTVLEFIL | NP      | 0.4306 (Probable Antigen)    | Probable Non-Allergen | Non-Toxin | Negative | Non-Inducer | Inducer     |
| LLIVKTVLEFILQKT | NP      | 0.4521<br>(Probable Antigen) | Probable Non-Allergen | Non-Toxin | Negative | Non-Inducer | Inducer     |
| PLILALKTLESTESQ | NP      | 1.0059                       | Probable Non-Allergen | Non-Toxin | Negative | Non-Inducer | Inducer     |

---

|                 |    |                              |                       |           |          |             |             |
|-----------------|----|------------------------------|-----------------------|-----------|----------|-------------|-------------|
|                 |    | (Probable Antigen)           |                       |           |          |             |             |
| VIFGILRSSFILKFV | NP | 0.4615<br>(Probable Antigen) | Probable Non-Allergen | Non-Toxin | Negative | Inducer     | Inducer     |
| EQGIVTYPNHWLTTG | NP | 0.4252<br>(Probable Antigen) | Probable Non-Allergen | Non-Toxin | Positive | Inducer     | Non-Inducer |
| HMKVIFGILRSSFIL | NP | 0.4892<br>(Probable Antigen) | Probable Non-Allergen | Non-Toxin | Negative | Non-Inducer | Inducer     |
| LILALKTLESTESQR | NP | 0.9183<br>(Probable Antigen) | Probable Non-Allergen | Non-Toxin | Negative | Non-Inducer | Inducer     |
| HYSPLILALKTLEST | NP | 1.2143<br>(Probable Antigen) | Probable Non-Allergen | Non-Toxin | Negative | Non-Inducer | Inducer     |
| YSPLILALKTLESTE | NP | 1.0656<br>(Probable Antigen) | Probable Non-Allergen | Non-Toxin | Negative | Non-Inducer | Inducer     |
| ILALKTLESTESQRG | NP | 0.9847<br>(Probable Antigen) | Probable Non-Allergen | Non-Toxin | Negative | Inducer     | Inducer     |
| PHYSPLILALKTLES | NP | 1.1049<br>(Probable Antigen) | Probable Non-Allergen | Non-Toxin | Negative | Non-Inducer | Inducer     |
| KPTAPHVRNKKVILF | NP | 1.0548<br>(Probable Antigen) | Probable Non-allergen | Non-Toxin | Negative | Non-Inducer | Non-Inducer |
| AHDAEVKLQRRHEHQ | NP | 0.9489<br>(Probable Antigen) | Probable Non-Allergen | Non-Toxin | Negative | Non-Inducer | Non-Inducer |
| DAEVKLQRRHEHQEI | NP | 1.0394<br>(Probable Antigen) | Probable Non-Allergen | Non-Toxin | Negative | Non-Inducer | Non-Inducer |
| EVKLQRRHEHQEIQA | NP | 1.0795<br>(Probable Antigen) | Probable Non-Allergen | Non-Toxin | Negative | Non-Inducer | Non-Inducer |
| HDAEVKLQRRHEHQE | NP | 0.9518<br>(Probable Antigen) | Probable Non-Allergen | Non-Toxin | Negative | Non-Inducer | Non-Inducer |
| VKLQRRHEHQEIQAI | NP | 1.1290<br>(Probable Antigen) | Probable Non-Allergen | Non-Toxin | Negative | Non-Inducer | Non-Inducer |

---

|                  |    |                              |                       |           |          |             |             |
|------------------|----|------------------------------|-----------------------|-----------|----------|-------------|-------------|
| EHGLYPQLSAIALGV  | NP | 1.0417<br>(Probable Antigen) | Probable Non-Allergen | Non-Toxin | Positive | Non-Inducer | Non-Inducer |
| HGLYPQLSAIALGVA  | NP | 1.0002<br>(Probable Antigen) | Probable Non-Allergen | Non-Toxin | Negative | Non-Inducer | Non-Inducer |
| WLTTGHMKVIFGILR  | NP | 0.4260<br>(Probable Antigen) | Probable Non-Allergen | Non-Toxin | Negative | Non-Inducer | Inducer     |
| FGILRSSFILKFVLI  | NP | 0.5364<br>(Probable Antigen) | Probable Non-Allergen | Non-Toxin | Negative | Non-Inducer | Inducer     |
| QSFLNDPTPVEVTVQ  | NP | 0.4995<br>(Probable Antigen) | Probable Non-Allergen | Non-Toxin | Positive | Non-Inducer | Non-Inducer |
| SFLNDPTPVEVTVQA  | NP | 0.6271<br>(Probable Antigen) | Probable Non-Allergen | Non-Toxin | Negative | Non-Inducer | Non-Inducer |
| SQSFLNDPTPVEVTV  | NP | 0.4197<br>(Probable Antigen) | Probable Non-Allergen | Non-Toxin | Negative | Non-Inducer | Non-Inducer |
| TVLEFILQKTDSGVT  | NP | 0.6168<br>(Probable Antigen) | Probable Non-Allergen | Non-Toxin | Negative | Inducer     | Non-Inducer |
| VSQSFLNDPTPVEVT  | NP | 0.5328<br>(Probable Antigen) | Probable Non-Allergen | Non-Toxin | Negative | Non-Inducer | Non-Inducer |
| LEHGLYPQLSAIALG  | NP | 1.1370<br>(Probable Antigen) | Probable Non-Allergen | Non-Toxin | Negative | Non-Inducer | Non-Inducer |
| NLEHGLYPQLSAIAL  | NP | 1.1559 (Probable<br>Antigen) | Probable Non-Allergen | Non-Toxin | Negative | Non-Inducer | Non-Inducer |
| APFARVLNLSGINNL  | NP | 0.4896<br>(Probable Antigen) | Probable Non-Allergen | Non-Toxin | Negative | Inducer     | Non-Inducer |
| DLPPPPLYAQEKQRQD | NP | 1.2267<br>(Probable Antigen) | Probable Non-Allergen | Non-Toxin | Negative | Non-Inducer | Non-Inducer |
| ESQRGRIGLFLSFCS  | NP | 0.5304<br>(Probable Antigen) | Probable Non-Allergen | Non-Toxin | Positive | Inducer     | Inducer     |
| LPPPPLYAQEKQRQDP | NP | 1.2767                       | Probable Non-Allergen | Non-Toxin | Negative | Non-Inducer | Non-Inducer |

---

|                 |    |                              |                       |           |          |             |             |
|-----------------|----|------------------------------|-----------------------|-----------|----------|-------------|-------------|
|                 |    | (Probable Antigen)           |                       |           |          |             |             |
| PPPLYAQEKRDPIQ  | NP | 1.1467<br>(Probable Antigen) | Probable Non-Allergen | Non-Toxin | Negative | Non-Inducer | Inducer     |
| PPPPLYAQEKRDPI  | NP | 1.3443<br>(Probable Antigen) | Probable Non-Allergen | Non-Toxin | Negative | Non-Inducer | Non-inducer |
| QRGRIGLFLSFCSLF | NP | 0.5802 (Probable<br>Antigen) | Probable Non-Allergen | Non-Toxin | Positive | Inducer     | Inducer     |
| SQRGRIGLFLSFCSL | NP | 0.8219<br>(Probable Antigen) | Probable Non-Allergen | Non-Toxin | Positive | Inducer     | Inducer     |
| YAPFARVLNLSGINN | NP | 0.5169<br>(Probable Antigen) | Probable Non-Allergen | Non-Toxin | Negative | Inducer     | Non-Inducer |
| LQKTEITHSQTAVL  | NP | 0.7452<br>(Probable Antigen) | Probable Non-Allergen | Non-Toxin | Negative | Non-Inducer | Inducer     |
| QKTEITHSQTAVLS  | NP | 0.8107<br>(Probable Antigen) | Probable Non-Allergen | Non-Toxin | Negative | Non-Inducer | Non-Inducer |
| DDESEYTTDSQESID | NP | 0.4147<br>(Probable Antigen) | Probable Non-Allergen | Non-Toxin | Negative | Inducer     | Non-Inducer |
| HSLELGTKPTAPHV  | NP | 0.8374<br>(Probable Antigen) | Probable Non-Allergen | Non-Toxin | Negative | Non-Inducer | Inducer     |
| LGTKPTAPHVRNKKV | NP | 1.3433<br>(Probable Antigen) | Probable Non-Allergen | Non-Toxin | Negative | Non-Inducer | Non-Inducer |
| LHSLELGTKPTAPH  | NP | 0.7611<br>(Probable Antigen) | Probable Non-Allergen | Non-Toxin | Negative | Non-Inducer | Non-Inducer |
| SLLELGTKPTAPHVR | NP | 1.1247<br>(Probable Antigen) | Probable Non-Allergen | Non-Toxin | Negative | Non-Inducer | Non-Inducer |
| ALKTLESTESQRGRI | NP | 0.6432<br>(Probable Antigen) | Probable Non-Allergen | Non-Toxin | Negative | Inducer     | Inducer     |
| LALKTLESTESQRGR | NP | 1.0285<br>(Probable Antigen) | Probable Non-Allergen | Non-Toxin | Negative | Inducer     | Inducer     |

---

|                 |      |                           |                       |           |          |             |             |
|-----------------|------|---------------------------|-----------------------|-----------|----------|-------------|-------------|
| LKTLESTESQRGRIG | NP   | 1.0019 (Probable Antigen) | Probable Non-Allergen | Non-Toxin | Negative | Inducer     | Inducer     |
| AKELQADWPDMSFDE | NP   | 0.8905 (Probable Antigen) | Probable Non-Allergen | Non-Toxin | Negative | Inducer     | Non-Inducer |
| ELQADWPDMSFDERR | NP   | 1.3503 (Probable Antigen) | Probable Non-Allergen | Non-Toxin | Negative | Inducer     | Non-Inducer |
| KELQADWPDMSFDER | NP   | 1.3021 (Probable Antigen) | Probable Non-Allergen | Non-Toxin | Negative | Inducer     | Non-Inducer |
| VSAKELQADWPDMSF | NP   | 1.3703 (Probable Antigen) | Probable Non-Allergen | Non-Toxin | Negative | Inducer     | Non-Inducer |
| KTEITHSQTLAVLSQ | NP   | 0.6850 (Probable Antigen) | Probable Non-Allergen | Non-Toxin | Negative | Non-Inducer | Non-Inducer |
| SNFEYPLAHTVAALL | VP40 | 0.4400 (Probable Antigen) | Probable Non-Allergen | Non-Toxin | Positive | Non-Inducer | Inducer     |
| NFEYPLAHTVAALLT | VP40 | 0.5362 (Probable Antigen) | Probable Non-Allergen | Non-Toxin | Positive | Non-Inducer | Inducer     |
| YPLAHTVAALLTGSY | VP40 | 0.5020 (Probable Antigen) | Probable Non-Allergen | Non-Toxin | Positive | Non-Inducer | Inducer     |
| GITPNYVGDLNLDDQ | VP40 | 1.2177 (Probable Antigen) | Probable Non-Allergen | Non-Toxin | Negative | Non-Inducer | Non-Inducer |
| ITPNYVGDLNLDDQF | VP40 | 1.1032 (Probable Antigen) | Probable Non-Allergen | Non-Toxin | Negative | Non-Inducer | Non-Inducer |
| NYVGDLNLDDQFKGN | VP40 | 0.7407 (Probable Antigen) | Probable Non-Allergen | Non-Toxin | Negative | Inducer     | Non-Inducer |
| PNYVGDLNLDDQFKG | VP40 | 0.9375 (Probable Antigen) | Probable Non-Allergen | Non-Toxin | Negative | Inducer     | Non-Inducer |
| QGITPNYVGDLNLDD | VP40 | 0.9663 (Probable Antigen) | Probable Non-Allergen | Non-Toxin | Negative | Non-Inducer | Non-Inducer |
| TPNYVGDLNLDDQFK | VP40 | 0.8878                    | Probable Non-Allergen | Non-Toxin | Negative | Inducer     | Non-Inducer |

---

|                 |      |                              |                       |           |          |             |             |
|-----------------|------|------------------------------|-----------------------|-----------|----------|-------------|-------------|
|                 |      | (Probable Antigen)           |                       |           |          |             |             |
| YVGDNLDDQFKGNV  | VP40 | 0.6878<br>(Probable Antigen) | Probable Non-Allergen | Non-Toxin | Negative | Inducer     | Non-Inducer |
| HPAVSIHPNLPPIVL | VP40 | 1.0327<br>(Probable Antigen) | Probable Non-Allergen | Non-Toxin | Positive | Non-Inducer | Inducer     |
| FPLNGFNRRQVVLAY | VP40 | 0.6541<br>(Probable Antigen) | Probable Non-Allergen | Non-Toxin | Negative | Non-Inducer | Non-Inducer |
| LNGFNRRQVVLAYAN | VP40 | 0.6950 (Probable Antigen)    | Probable Non-Allergen | Non-Toxin | Negative | Non-Inducer | Non-Inducer |
| NFPLNGFNRRQVVLA | VP40 | 0.6309<br>(Probable Antigen) | Probable Non-Allergen | Non-Toxin | Negative | Non-Inducer | Non-Inducer |
| PLNGFNRRQVVLAYA | VP40 | 0.5537<br>(Probable Antigen) | Probable Non-Allergen | Non-Toxin | Negative | Non-Inducer | Non-Inducer |
| STNQFTYNLTNLVLS | VP40 | 0.4115<br>(Probable Antigen) | Probable Non-Allergen | Non-Toxin | Negative | Non-Inducer | Non-Inducer |
| TNQFTYNLTNLVLSV | VP40 | 0.4663<br>(Probable Antigen) | Probable Non-Allergen | Non-Toxin | Negative | Non-Inducer | Non-Inducer |
| GVPAWLPLGIMSNFE | VP40 | 0.9261<br>(Probable Antigen) | Probable Non-Allergen | Non-Toxin | Negative | Inducer     | Non-Inducer |
| KGVPAWLPLGIMSNF | VP40 | 0.8517<br>(Probable Antigen) | Probable Non-Allergen | Non-Toxin | Negative | Non-Inducer | Non-Inducer |
| PAWLPLGIMSNFEYP | VP40 | 1.0927<br>(Probable Antigen) | Probable Non-Allergen | Non-Toxin | Negative | Inducer     | Non-Inducer |
| VKGVPAWLPLGIMSN | VP40 | 0.9631<br>(Probable Antigen) | Probable Non-Allergen | Non-Toxin | Negative | Non-Inducer | Non-Inducer |
| VPWLPLGIMSNFEY  | VP40 | 1.0258 (Probable Antigen)    | Probable Non-Allergen | Non-Toxin | Negative | Inducer     | Non-Inducer |
| LGIMSNFEYPLAHTV | VP40 | 0.6167<br>(Probable Antigen) | Probable Non-Allergen | Non-Toxin | Positive | Inducer     | Non-Inducer |

---

---

|                 |      |                              |                       |           |          |             |             |
|-----------------|------|------------------------------|-----------------------|-----------|----------|-------------|-------------|
| LPLGIMSNFEYPLAH | VP40 | 0.6376<br>(Probable Antigen) | Probable Non-Allergen | Non-Toxin | Negative | Inducer     | Non-Inducer |
| PLGIMSNFEYPLAHT | VP40 | 0.6427<br>(Probable Antigen) | Probable Non-Allergen | Non-Toxin | Negative | Inducer     | Non-Inducer |
| MHPAVSIHPNLPPIV | VP40 | 1.0123<br>(Probable Antigen) | Probable Non-Allergen | Non-Toxin | Positive | Non-Inducer | Inducer     |
| NTYMQYLNPPPYADH | VP40 | 0.6142<br>(Probable Antigen) | Probable Non-Allergen | Non-Toxin | Negative | Inducer     | Non-Inducer |
| NYNTYMQYLNPPPYA | VP40 | 0.7003<br>(Probable Antigen) | Probable Non-Allergen | Non-Toxin | Negative | Inducer     | Non-Inducer |
| YNTYMQYLNPPPYAD | VP40 | 0.6447<br>(Probable Antigen) | Probable Non-Allergen | Non-Toxin | Negative | Inducer     | Non-Inducer |
| NRQVVLAYANPTLSA | VP40 | 0.8623<br>(Probable Antigen) | Probable Non-Allergen | Non-Toxin | Positive | Non-Inducer | Non-Inducer |
| SNYNTYMQYLNPPPY | VP40 | 0.6456<br>(Probable Antigen) | Probable Non-Allergen | Non-Toxin | Negative | Inducer     | Non-Inducer |
| NQFTYNLTNLVLSVQ | VP40 | 0.7212<br>(Probable Antigen) | Probable Non-Allergen | Non-Toxin | Negative | Non-Inducer | Non-Inducer |
| FTYNLTNLVLSVQKL | VP40 | 0.7914<br>(Probable Antigen) | Probable Non-Allergen | Non-Toxin | Negative | Non-Inducer | Non-Inducer |
| QFTYNLTNLVLSVQK | VP40 | 0.8980<br>(Probable Antigen) | Probable Non-Allergen | Non-Toxin | Negative | Non-Inducer | Non-Inducer |
| SSNYNTYMQYLNPPP | VP40 | 0.5525<br>(Probable Antigen) | Probable Non-Allergen | Non-Toxin | Negative | Inducer     | Non-Inducer |
| AHPLRMLREGNQAFI | VP40 | 0.5379<br>(Probable Antigen) | Probable Non-Allergen | Non-Toxin | Positive | Non-Inducer | Inducer     |
| HPLRMLREGNQAFIQ | VP40 | 0.4345<br>(Probable Antigen) | Probable Non-Allergen | Non-Toxin | Positive | Non-Inducer | Inducer     |
| PLRMLREGNQAFIQN | VP40 | 0.4233                       | Probable Non-Allergen | Non-Toxin | Positive | Non-Inducer | Inducer     |

---

---

|                 |      |                              |                       |           |          |             |             |
|-----------------|------|------------------------------|-----------------------|-----------|----------|-------------|-------------|
|                 |      | (Probable Antigen)           |                       |           |          |             |             |
| FHILAQVLSKIAYKS | VP35 | 0.7346<br>(Probable Antigen) | Probable Non-Allergen | Non-Toxin | Negative | Inducer     | Non-Inducer |
| DKGWVCVYSSEQGET | VP35 | 0.6287<br>(Probable Antigen) | Probable Non-Allergen | Non-Toxin | Negative | Inducer     | Inducer     |
| GWVCVYSSEQGETRA | VP35 | 0.7019<br>(Probable Antigen) | Probable Non-Allergen | Non-Toxin | Positive | Non-Inducer | Inducer     |
| IDKGWVCVYSSEQGE | VP35 | 0.6988<br>(Probable Antigen) | Probable Non-Allergen | Non-Toxin | Negative | Inducer     | Inducer     |
| WVCVYSSEQGETRAL | VP35 | 0.4331<br>(Probable Antigen) | Probable Non-Allergen | Non-Toxin | Negative | Inducer     | Inducer     |
| PFHILAQVLSKIAYK | VP35 | 0.6978<br>(Probable Antigen) | Probable Non-Allergen | Non-Toxin | Positive | Inducer     | Non-Inducer |
| TPFHILAQVLSKIAY | VP35 | 0.4788<br>(Probable Antigen) | Probable Non-Allergen | Non-Toxin | Positive | Inducer     | Non-Inducer |
| KIAYKSGKSGAFLDA | VP35 | 0.9643<br>(Probable Antigen) | Probable Non-Allergen | Non-Toxin | Positive | Inducer     | Non-Inducer |
| SKIAYKSGKSGAFLD | VP35 | 1.0699 (Probable Antigen)    | Probable Non-Allergen | Non-Toxin | Positive | Non-Inducer | Non-Inducer |
| VLSKIAYKSGKSGAF | VP35 | 0.9713<br>(Probable Antigen) | Probable Non-Allergen | Non-Toxin | Negative | Non-Inducer | Non-Inducer |
| EITPVLMGRTLEAI  | VP35 | 0.9411<br>(Probable Antigen) | Probable Non-Allergen | Non-Toxin | Positive | Inducer     | Inducer     |
| LKMGRTEAISKGMS  | VP35 | 0.7925<br>(Probable Antigen) | Probable Non-Allergen | Non-Toxin | Negative | Inducer     | Inducer     |
| PVLKMGRTEAISKG  | VP35 | 0.5692 (Probable Antigen)    | Probable Non-Allergen | Non-Toxin | Positive | Inducer     | Inducer     |
| VLMGRTEAISKGM   | VP35 | 0.5541<br>(Probable Antigen) | Probable Non-Allergen | Non-Toxin | Negative | Inducer     | Inducer     |

---



|                 |      |                              |                       |           |          |             |             |
|-----------------|------|------------------------------|-----------------------|-----------|----------|-------------|-------------|
| NNTPFHILAQVLSKI | VP35 | 0.4126<br>(Probable Antigen) | Probable Non-Allergen | Non-Toxin | Positive | Inducer     | Non-Inducer |
| FKDLGVAQQACSKGT | VP35 | 0.9429<br>(Probable Antigen) | Probable Non-Allergen | Non-Toxin | Negative | Inducer     | Non-Inducer |
| PPQPAIFKDLGVAQQ | VP35 | 0.4261<br>(Probable Antigen) | Probable Non-Allergen | Non-Toxin | Negative | Inducer     | Non-Inducer |
| EPFLALRILLGVALK | VP24 | 0.9143<br>(Probable Antigen) | Probable Non-Allergen | Non-Toxin | Negative | Non-Inducer | Non-Inducer |
| FLALRILLGVALKDQ | VP24 | 1.1248<br>(Probable Antigen) | Probable Non-Allergen | Non-Toxin | Negative | Non-Inducer | Non-Inducer |
| IEPFLALRILLGVAL | VP24 | 0.6630<br>(Probable Antigen) | Probable Non-Allergen | Non-Toxin | Negative | Non-Inducer | Non-Inducer |
| LALRILLGVALKDQE | VP24 | 1.2741<br>(Probable Antigen) | Probable Non-Allergen | Non-Toxin | Negative | Non-Inducer | Non-Inducer |
| PFLALRILLGVALKD | VP24 | 1.1340<br>(Probable Antigen) | Probable Non-Allergen | Non-Toxin | Negative | Non-Inducer | Non-Inducer |
| FVFHIPNTGMTLLHH | VP24 | 0.4556<br>(Probable Antigen) | Probable Non-Allergen | Non-Toxin | Negative | Inducer     | Non-Inducer |
| GNFVHIPNTGMTLL  | VP24 | 0.6285<br>(Probable Antigen) | Probable Non-Allergen | Non-Toxin | Negative | Non-Inducer | Non-Inducer |
| NFVHIPNTGMTLLH  | VP24 | 0.6826<br>(Probable Antigen) | Probable Non-Allergen | Non-Toxin | Negative | Non-Inducer | Non-Inducer |
| TVKWGNFVHIPNTG  | VP24 | 1.0717<br>(Probable Antigen) | Probable Non-Allergen | Non-Toxin | Negative | Inducer     | Non-Inducer |
| WGNFVHIPNTGMTL  | VP24 | 0.7569<br>(Probable Antigen) | Probable Non-Allergen | Non-Toxin | Negative | Inducer     | Non-Inducer |
| TGMTLLHHLKSNFVV | VP24 | 0.6205<br>(Probable Antigen) | Probable Non-Allergen | Non-Toxin | Negative | Non-Inducer | Non-Inducer |
| GMTLLHHLKSNFVVP | VP24 | 0.4513                       | Probable Non-Allergen | Non-Toxin | Positive | Non-Inducer | Non-Inducer |

---

|                  |      |                              |                       |           |          |             |             |
|------------------|------|------------------------------|-----------------------|-----------|----------|-------------|-------------|
|                  |      | (Probable Antigen)           |                       |           |          |             |             |
| NTGMTLLHHLKSNFV  | VP24 | 0.6872<br>(Probable Antigen) | Probable Non-Allergen | Non-Toxin | Negative | Inducer     | Inducer     |
| IKLTGQQIIITRVNM  | VP24 | 0.6071<br>(Probable Antigen) | Probable Non-Allergen | Non-Toxin | Negative | Inducer     | Non-Inducer |
| ESVVFGLVAEAVLRE  | VP24 | 0.5288<br>(Probable Antigen) | Probable Non-Allergen | Non-Toxin | Negative | Inducer     | Inducer     |
| HVVNDHGKPSIEIK   | VP24 | 0.8888<br>(Probable Antigen) | Probable Non-Allergen | Non-Toxin | Positive | Inducer     | Non-Inducer |
| LHVVDHGKPSIEI    | VP24 | 0.6198<br>(Probable Antigen) | Probable Non-Allergen | Non-Toxin | Positive | Inducer     | Non-Inducer |
| LSESVFGLVAEAVL   | VP24 | 0.5214<br>(Probable Antigen) | Probable Non-Allergen | Non-Toxin | Negative | Non-Inducer | Inducer     |
| SESVFGLVAEAVLR   | VP24 | 0.5012<br>(Probable Antigen) | Probable Non-Allergen | Non-Toxin | Negative | Non-Inducer | Inducer     |
| TLHVVDHGKPSIE    | VP24 | 0.4785<br>(Probable Antigen) | Probable Non-Allergen | Non-Toxin | Positive | Inducer     | Non-Inducer |
| TVLSESVFGLVAEA   | VP24 | 0.5868<br>(Probable Antigen) | Probable Non-Allergen | Non-Toxin | Negative | Non-Inducer | Inducer     |
| VLSESVFGLVAEAV   | VP24 | 0.5204<br>(Probable Antigen) | Probable Non-Allergen | Non-Toxin | Negative | Non-Inducer | Inducer     |
| VVFGGLVAEAVLREHS | VP24 | 0.5622<br>(Probable Antigen) | Probable Non-Allergen | Non-Toxin | Positive | Non-Inducer | Inducer     |
| AIHISPNLLGIYLT   | VP24 | 1.1713<br>(Probable Antigen) | Probable Non-Allergen | Non-Toxin | Negative | Inducer     | Inducer     |
| EVTSAIHISPNLLGI  | VP24 | 1.2318<br>(Probable Antigen) | Probable Non-Allergen | Non-Toxin | Negative | Inducer     | Inducer     |
| IHISPNLLGIYLTSD  | VP24 | 1.0334<br>(Probable Antigen) | Probable Non-Allergen | Non-Toxin | Negative | Inducer     | Inducer     |

---

---

|                  |      |                              |                       |           |          |             |             |
|------------------|------|------------------------------|-----------------------|-----------|----------|-------------|-------------|
| LEVTSAIHISPNTLLG | VP24 | 1.1628<br>(Probable Antigen) | Probable Non-Allergen | Non-Toxin | Negative | Inducer     | Inducer     |
| SAIHISPNTLLGIYLT | VP24 | 1.2424<br>(Probable Antigen) | Probable Non-Allergen | Non-Toxin | Negative | Inducer     | Inducer     |
| TSAIHISPNTLLGIYL | VP24 | 1.0230<br>(Probable Antigen) | Probable Non-Allergen | Non-Toxin | Negative | Inducer     | Inducer     |
| HIPNTGMTLLHHLKS  | VP24 | 0.5283<br>(Probable Antigen) | Probable Non-Allergen | Non-Toxin | Negative | Non-Inducer | Non-Inducer |
| IPNTGMTLLHHLKSN  | VP24 | 0.4539<br>(Probable Antigen) | Probable Non-Allergen | Non-Toxin | Negative | Non-Inducer | Non-Inducer |
| PNTGMTLLHHLKSNF  | VP24 | 0.5804<br>(Probable Antigen) | Probable Non-Allergen | Non-Toxin | Negative | Non-Inducer | Inducer     |
| HISPNTLLGIYLTSDM | VP24 | 0.8902<br>(Probable Antigen) | Probable Non-Allergen | Non-Toxin | Negative | Non-Inducer | Non-Inducer |
| ISPNTLLGIYLTSDMF | VP24 | 0.6025<br>(Probable Antigen) | Probable Non-Allergen | Non-Toxin | Negative | Non-Inducer | Inducer     |
| VRRIDIEPCCGETVL  | VP24 | 0.5822<br>(Probable Antigen) | Probable Non-Allergen | Non-Toxin | Negative | Inducer     | Non-Inducer |
| LLEVTSAIHISPNTLL | VP24 | 0.9662<br>(Probable Antigen) | Probable Non-Allergen | Non-Toxin | Negative | Non-Inducer | Inducer     |
| KPHYTNYHPRARSMS  | VP30 | 1.3278<br>(Probable Antigen) | Probable Non-Allergen | Non-Toxin | Negative | Non-Inducer | Non-Inducer |
| NYHPRARSMSSTRSS  | VP30 | 1.2240<br>(Probable Antigen) | Probable Non-Allergen | Non-Toxin | Positive | Non-Inducer | Non-Inducer |
| TNYHPRARSMSSTRS  | VP30 | 1.1584<br>(Probable Antigen) | Probable Non-Allergen | Non-Toxin | Positive | Non-Inducer | Non-Inducer |
| QFEAALWQGWDKRSI  | VP30 | 0.4264 (Probable Antigen)    | Probable Non-Allergen | Non-Toxin | Positive | Inducer     | Non-Inducer |
| WQGWDKRSISLQVQA  | VP30 | 0.6073                       | Probable Non-Allergen | Non-Toxin | Negative | Inducer     | Inducer     |

---

---

|                  |      |                              |                       |           |          |             |             |
|------------------|------|------------------------------|-----------------------|-----------|----------|-------------|-------------|
|                  |      | (Probable Antigen)           |                       |           |          |             |             |
| YTGHLDKGGQFEAA   | VP30 | 0.7358<br>(Probable Antigen) | Probable Non-Allergen | Non-Toxin | Negative | Inducer     | Non-Inducer |
| LTNRELLLLMARKML  | VP30 | 0.8097<br>(Probable Antigen) | Probable Non-Allergen | Non-Toxin | Negative | Non-Inducer | Inducer     |
| NLTNRELLLLMARKM  | VP30 | 1.1119<br>(Probable Antigen) | Probable Non-Allergen | Non-Toxin | Negative | Inducer     | Inducer     |
| NRELLLLMARKMLPN  | VP30 | 0.4783<br>(Probable Antigen) | Probable Non-Allergen | Non-Toxin | Negative | Inducer     | Non-Inducer |
| TNRELLLLMARKMLP  | VP30 | 0.7001<br>(Probable Antigen) | Probable Non-Allergen | Non-Toxin | Negative | Inducer     | Non-Inducer |
| EQTKDVLTLLENLGH  | VP30 | 0.7558<br>(Probable Antigen) | Probable Non-Allergen | Non-Toxin | Negative | Inducer     | Non-Inducer |
| QEQTkdVLTLENLGH  | VP30 | 0.6791<br>(Probable Antigen) | Probable Non-Allergen | Non-Toxin | Negative | Inducer     | Non-Inducer |
| QTKDVLTLLENLGHIL | VP30 | 0.6795<br>(Probable Antigen) | Probable Non-Allergen | Non-Toxin | Negative | Non-Inducer | Non-Inducer |
| TKDVLTLLENLGHILS | VP30 | 0.4267<br>(Probable Antigen) | Probable Non-Allergen | Non-Toxin | Negative | Non-Inducer | Non-Inducer |
| VLTLLENLGHILSYLH | VP30 | 0.5886<br>(Probable Antigen) | Probable Non-Allergen | Non-Toxin | Negative | Non-Inducer | Inducer     |
| DETSLRAALSLTCAG  | VP30 | 0.9044<br>(Probable Antigen) | Probable Non-Allergen | Non-Toxin | Negative | Inducer     | Non-Inducer |
| ETSLRAALSLTCAGI  | VP30 | 1.0964<br>(Probable Antigen) | Probable Non-Allergen | Non-Toxin | Negative | Inducer     | Non-Inducer |
| KLDETSLRAALSLTC  | VP30 | 1.0843<br>(Probable Antigen) | Probable Non-Allergen | Non-Toxin | Negative | Inducer     | Non-Inducer |
| LDETSLRAALSLTCA  | VP30 | 1.0235<br>(Probable Antigen) | Probable Non-Allergen | Non-Toxin | Negative | Inducer     | Non-Inducer |

---

---

|                 |      |                              |                       |           |          |             |             |
|-----------------|------|------------------------------|-----------------------|-----------|----------|-------------|-------------|
| LENLGHILSYLHRSE | VP30 | 0.4423<br>(Probable Antigen) | Probable Non-Allergen | Non-Toxin | Negative | Non-Inducer | Inducer     |
| KRRIQLQIDFSDQV  | L    | 0.5298<br>(Probable Antigen) | Probable Non-Allergen | Non-Toxin | Negative | Inducer     | Inducer     |
| RRIQLQIDFSDQVG  | L    | 0.8149<br>(Probable Antigen) | Probable Non-Allergen | Non-Toxin | Negative | Inducer     | Inducer     |
| CFIMIKDVFIERYNT | L    | 0.7381<br>(Probable Antigen) | Probable Non-Allergen | Non-Toxin | Negative | Inducer     | Non-Inducer |
| SYECFIMIKDVFIER | L    | 0.8717<br>(Probable Antigen) | Probable Non-Allergen | Non-Toxin | Negative | Inducer     | Non-Inducer |
| KLPYRVRNVQTLAEA | L    | 0.7172<br>(Probable Antigen) | Probable Non-Allergen | Non-Toxin | Negative | Inducer     | Non-Inducer |
| PYRVRNVQTLAEALL | L    | 0.4011<br>(Probable Antigen) | Probable Non-Allergen | Non-Toxin | Negative | Non-Inducer | Inducer     |
| YRVRNVQTLAEALLA | L    | 0.4393<br>(Probable Antigen) | Probable Non-Allergen | Non-Toxin | Negative | Non-Inducer | Non-Inducer |
| QLKPILKILQRSLDL | L    | 0.6361<br>(Probable Antigen) | Probable Non-Allergen | Non-Toxin | Negative | Non-Inducer | Inducer     |
| RLILNNLTIQITDIT | L    | 0.8099<br>(Probable Antigen) | Probable Non-Allergen | Non-Toxin | Negative | Non-Inducer | Non-Inducer |
| ALFHKVQSYVRQGKQ | L    | 0.4378<br>(Probable Antigen) | Probable Non-Allergen | Non-Toxin | Negative | Inducer     | Inducer     |
| DLSIFIKDRLTAVNQ | L    | 0.8805<br>(Probable Antigen) | Probable Non-Allergen | Non-Toxin | Negative | Non-Inducer | Non-Inducer |
| IFIKDRLTAVNQECW | L    | 0.9179<br>(Probable Antigen) | Probable Non-Allergen | Non-Toxin | Negative | Non-Inducer | Non-Inducer |
| IISDLSIFIKDRLTA | L    | 0.4747<br>(Probable Antigen) | Probable Non-Allergen | Non-Toxin | Negative | Inducer     | Non-Inducer |
| ISDLSIFIKDRLTAV | L    | 0.9052                       | Probable Non-Allergen | Non-Toxin | Negative | Inducer     | Non-Inducer |

---

---

|                  |   |                              |                       |           |          |             |             |
|------------------|---|------------------------------|-----------------------|-----------|----------|-------------|-------------|
|                  |   | (Probable Antigen)           |                       |           |          |             |             |
| LGYNPPVRFQSKRVP  | L | 0.5680<br>(Probable Antigen) | Probable Non-Allergen | Non-Toxin | Negative | Inducer     | Non-Inducer |
| LSIFIKDRLTAVNQE  | L | 0.9313<br>(Probable Antigen) | Probable Non-Allergen | Non-Toxin | Negative | Non-Inducer | Non-Inducer |
| SDLSIFIKDRLTAVN  | L | 0.8968<br>(Probable Antigen) | Probable Non-Allergen | Non-Toxin | Negative | Non-Inducer | Non-Inducer |
| SIFIKDRLTAVNQEC  | L | 0.8792<br>(Probable Antigen) | Probable Non-Allergen | Non-Toxin | Negative | Non-Inducer | Non-Inducer |
| ASFHSM LAINLLNQN | L | 0.6923<br>(Probable Antigen) | Probable Non-Allergen | Non-Toxin | Negative | Non-Inducer | Inducer     |
| LQSTFRHELVLTRLA  | L | 0.4715<br>(Probable Antigen) | Probable Non-Allergen | Non-Toxin | Negative | Inducer     | Inducer     |
| KEELFYILISKK PGL | L | 0.7085<br>(Probable Antigen) | Probable Non-Allergen | Non-Toxin | Negative | Inducer     | Inducer     |
| ELKTKLKLKSSVMGD  | L | 1.0699<br>(Probable Antigen) | Probable Non-Allergen | Non-Toxin | Negative | Inducer     | Non-Inducer |
| ITLVELKTKLKLKSS  | L | 1.6996<br>(Probable Antigen) | Probable Non-allergen | Non-Toxin | Positive | Inducer     | Non-Inducer |
| LKTKLKLKSSVMGDN  | L | 0.9807<br>(Probable Antigen) | Probable Non-Allergen | Non-Toxin | Negative | Inducer     | Non-Inducer |
| LKTKLKLKSSVMGDN  | L | 1.2587<br>(Probable Antigen) | Probable Non-Allergen | Non-Toxin | Negative | Inducer     | Non-Inducer |
| QITLVELKTKLKLKS  | L | 1.7692<br>(Probable Antigen) | Probable Non-Allergen | Non-Toxin | Positive | Inducer     | Non-Inducer |
| TLVELKTKLKLKSSV  | L | 1.2829<br>(Probable Antigen) | Probable Non-Allergen | Non-Toxin | Positive | Inducer     | Non-Inducer |
| VELKTKLKLKSSVMG  | L | 1.4739<br>(Probable Antigen) | Probable Non-Allergen | Non-Toxin | Positive | Inducer     | Non-Inducer |

---

|                  |   |                              |                       |           |          |             |             |
|------------------|---|------------------------------|-----------------------|-----------|----------|-------------|-------------|
| QVGIFLICKAMSRQR  | L | 0.7663<br>(Probable Antigen) | Probable Non-Allergen | Non-Toxin | Negative | Inducer     | Inducer     |
| VGIFLICKAMSRQRQ  | L | 0.7844<br>(Probable Antigen) | Probable Non-Allergen | Non-Toxin | Negative | Inducer     | Inducer     |
| IGYILFFPFGLFKSG  | L | 0.4898<br>(Probable Antigen) | Probable Non-Allergen | Non-Toxin | Positive | Non-Inducer | Inducer     |
| LNRVIGYILFFPFGL  | L | 0.4923<br>(Probable Antigen) | Probable Non-Allergen | Non-Toxin | Negative | Inducer     | Inducer     |
| NRVIGYILFFPFGLF  | L | 0.4308<br>(Probable Antigen) | Probable Non-Allergen | Non-Toxin | Negative | Inducer     | Inducer     |
| RIQLQIDFSDQVGI   | L | 0.9520<br>(Probable Antigen) | Probable Non-Allergen | Non-Toxin | Positive | Inducer     | Non-Inducer |
| NWSQLVEILPNMHSV  | L | 0.6075<br>(Probable Antigen) | Probable Non-Allergen | Non-Toxin | Negative | Inducer     | Inducer     |
| QLVEILPNMHSVCIV  | L | 1.0083<br>(Probable Antigen) | Probable Non-Allergen | Non-Toxin | Negative | Inducer     | Inducer     |
| SQLVEILPNMHSVCI  | L | 0.8440<br>(Probable Antigen) | Probable Non-Allergen | Non-Toxin | Negative | Inducer     | Inducer     |
| VEILPNMHSVCIVHV  | L | 1.2109<br>(Probable Antigen) | Probable Non-Allergen | Non-Toxin | Negative | Inducer     | Inducer     |
| NFIKTIVQAKLTPQQ  | L | 0.4474<br>(Probable Antigen) | Probable Non-Allergen | Non-Toxin | Negative | Non-Inducer | Non-Inducer |
| KETDYLLFFNTLATDS | L | 0.5425<br>(Probable Antigen) | Probable Non-Allergen | Non-Toxin | Positive | Inducer     | Non-inducer |
| KWKETDYLLFFNTLAT | L | 0.9008<br>(Probable Antigen) | Probable Non-Allergen | Non-Toxin | Negative | Inducer     | Inducer     |
| WKETDYLLFFNTLATD | L | 0.6457<br>(Probable Antigen) | Probable Non-Allergen | Non-Toxin | Negative | Inducer     | Non-Inducer |
| SHRSLRILQSTFRHE  | L | 0.4839                       | Probable Non-Allergen | Non-Toxin | Positive | Inducer     | Non-Inducer |

---

|                 |   |                              |                       |           |          |             |             |
|-----------------|---|------------------------------|-----------------------|-----------|----------|-------------|-------------|
|                 |   | (Probable Antigen)           |                       |           |          |             |             |
| EKLIALITPQVLGGL | L | 0.4256<br>(Probable Antigen) | Probable Non-Allergen | Non-Toxin | Negative | Non-Inducer | Non-Inducer |
| ILGLDHFVSASARSQ | L | 0.8159<br>(Probable Antigen) | Probable Non-Allergen | Non-Toxin | Negative | Inducer     | Non-Inducer |
| KILGLDHFVSASARS | L | 0.6893<br>(Probable Antigen) | Probable Non-Allergen | Non-Toxin | Negative | Inducer     | Non-Inducer |
| NKILGLDHFVSASAR | L | 0.6140<br>(Probable Antigen) | Probable Non-Allergen | Non-Toxin | Negative | Inducer     | Inducer     |
| LHLTPYLRQHIVSNS | L | 0.6907<br>(Probable Antigen) | Probable Non-Allergen | Non-Toxin | Negative | Non-Inducer | Inducer     |
| CLLEQFEVKWINLSE | L | 1.1520<br>(Probable Antigen) | Probable Non-Allergen | Non-Toxin | Negative | Inducer     | Non-Inducer |
| EQFEVKWINLSEDLR | L | 1.2273<br>(Probable Antigen) | Probable Non-Allergen | Non-Toxin | Negative | Inducer     | Non-Inducer |
| FEVKWINLSEDLREQ | L | 1.4122<br>(Probable Antigen) | Probable Non-Allergen | Non-Toxin | Negative | Inducer     | Non-Inducer |
| FGKLPYRVRNVQTLA | L | 1.0330<br>(Probable Antigen) | Probable Non-Allergen | Non-Toxin | Negative | Inducer     | Non-Inducer |
| LEQFEVKWINLSEDL | L | 0.9466<br>(Probable Antigen) | Probable Non-Allergen | Non-Toxin | Negative | Inducer     | Non-Inducer |
| LLEQFEVKWINLSED | L | 0.8927<br>(Probable Antigen) | Probable Non-Allergen | Non-Toxin | Negative | Inducer     | Non-Inducer |
| QFEVKWINLSEDLRE | L | 1.3013<br>(Probable Antigen) | Probable Non-Allergen | Non-Toxin | Negative | Inducer     | Non-Inducer |
| TFGKLPYRVRNVQTL | L | 1.0412<br>(Probable Antigen) | Probable Non-Allergen | Non-Toxin | Negative | Inducer     | Non-Inducer |
| RPSEGIRFKDNQKIT | L | 0.9048<br>(Probable Antigen) | Probable Non-Allergen | Non-Toxin | Positive | Inducer     | Non-Inducer |

---



---

|                 |   |                              |                       |           |          |             |             |
|-----------------|---|------------------------------|-----------------------|-----------|----------|-------------|-------------|
| GLFQLKNALEFLEKE | L | 1.0254<br>(Probable Antigen) | Probable Non-Allergen | Non-Toxin | Negative | Inducer     | Inducer     |
| SGLFQLKNALEFLEK | L | 0.7677<br>(Probable Antigen) | Probable Non-Allergen | Non-Toxin | Positive | Inducer     | Inducer     |
| LLWVTQGTADREKLL | L | 0.5606<br>(Probable Antigen) | Probable Non-Allergen | Non-Toxin | Positive | Non-Inducer | Inducer     |
| SRLWVTQGTADREK  | L | 0.7315<br>(Probable Antigen) | Probable Non-Allergen | Non-Toxin | Positive | Non-Inducer | Inducer     |
| DYQTVLNFLPTHYSG | L | 0.6046<br>(Probable Antigen) | Probable Non-Allergen | Non-Toxin | Positive | Inducer     | Inducer     |
| KLIALITPQVLGGLS | L | 0.6541<br>(Probable Antigen) | Probable Non-Allergen | Non-Toxin | Negative | Non-Inducer | Non-Inducer |
| TVLNFLPTHYSGNIV | L | 0.6360<br>(Probable Antigen) | Probable Non-Allergen | Non-Toxin | Negative | Inducer     | Inducer     |
| VLNFLPTHYSGNIVH | L | 0.6307<br>(Probable Antigen) | Probable Non-Allergen | Non-Toxin | Negative | Inducer     | Inducer     |
| YQTVLNFLPTHYSGN | L | 0.4202<br>(Probable Antigen) | Probable Non-Allergen | Non-Toxin | Positive | Inducer     | Inducer     |
| MLINTYKRDLHACFD | L | 0.4845<br>(Probable Antigen) | Probable Non-Allergen | Non-Toxin | Negative | Non-Inducer | Inducer     |
| GMLLLVHLSQLARRI | L | 0.4521<br>(Probable Antigen) | Probable Non-Allergen | Non-Toxin | Negative | Non-Inducer | Inducer     |
| NPYYWGMLLLVHLSQ | L | 0.9319<br>(Probable Antigen) | Probable Non-Allergen | Non-Toxin | Negative | Non-Inducer | Non-Inducer |
| PYYWGMLLLVHLSQL | L | 0.8984<br>(Probable Antigen) | Probable Non-Allergen | Non-Toxin | Negative | Non-Inducer | Inducer     |
| WGMLLLVHLSQLARR | L | 0.8229<br>(Probable Antigen) | Probable Non-Allergen | Non-Toxin | Negative | Non-Inducer | Inducer     |
| YWGMLLLVHLSQLAR | L | 0.5977                       | Probable Non-Allergen | Non-Toxin | Negative | Non-Inducer | Inducer     |

---

---

|                  |   |                              |                       |           |          |             |             |
|------------------|---|------------------------------|-----------------------|-----------|----------|-------------|-------------|
|                  |   | (Probable Antigen)           |                       |           |          |             |             |
| YYWGMLLL VHLSQLA | L | 0.7248<br>(Probable Antigen) | Probable Non-Allergen | Non-Toxin | Negative | Non-Inducer | Non-Inducer |
| SMHYKLYDLLPPGKL  | L | 1.0052<br>(Probable Antigen) | Probable Non-Allergen | Non-Toxin | Negative | Non-Inducer | Non-Inducer |
| SSMHYKLYDLLPPGK  | L | 1.0296<br>(Probable Antigen) | Probable Non-Allergen | Non-Toxin | Negative | Non-Inducer | Non-Inducer |
| VSSMHYKLYDLLPPG  | L | 1.0154<br>(Probable Antigen) | Probable Non-Allergen | Non-Toxin | Negative | Non-Inducer | Non-Inducer |
| FSEKLIALITPQVLG  | L | 0.5543<br>(Probable Antigen) | Probable Non-Allergen | Non-Toxin | Negative | Non-Inducer | Non-Inducer |
| RLLKLD FIRNTKIA  | L | 0.4594<br>(Probable Antigen) | Probable Non-Allergen | Non-Toxin | Negative | Inducer     | Inducer     |
| DREKLLIPLLNSRVN  | L | 0.6049<br>(Probable Antigen) | Probable Non-Allergen | Non-Toxin | Positive | Non-Inducer | Non-Inducer |
| REKLLIPLLNSRVNL  | L | 0.7482<br>(Probable Antigen) | Probable Non-Allergen | Non-Toxin | Negative | Non-Inducer | Non-Inducer |
| KLDFIRNTKIAEQKL  | L | 0.4640<br>(Probable Antigen) | Probable Non-Allergen | Non-Toxin | Negative | Inducer     | Non-Inducer |
| LDFIRNTKIAEQKLL  | L | 0.4895<br>(Probable Antigen) | Probable Non-Allergen | Non-Toxin | Negative | Inducer     | Non-Inducer |
| LKLD FIRNTKIAEQK | L | 0.6126<br>(Probable Antigen) | Probable Non-Allergen | Non-Toxin | Negative | Inducer     | Non-Inducer |
| LLKLD FIRNTKIAEQ | L | 0.5074<br>(Probable Antigen) | Probable Non-Allergen | Non-Toxin | Negative | Inducer     | Non-Inducer |
| LLLKLD FIRNTKIAE | L | 0.5702<br>(Probable Antigen) | Probable Non-Allergen | Non-Toxin | Negative | Inducer     | Inducer     |
| LTFSEKLIALITPQV  | L | 0.7316<br>(Probable Antigen) | Probable Non-Allergen | Non-Toxin | Negative | Non-Inducer | Non-Inducer |

---

|                  |   |                              |                       |           |          |             |             |
|------------------|---|------------------------------|-----------------------|-----------|----------|-------------|-------------|
| DSNIIFQNTINLGVA  | L | 0.7090<br>(Probable Antigen) | Probable Non-Allergen | Non-Toxin | Negative | Non-Inducer | Non-Inducer |
| IDSNIIFQNTINLGV  | L | 0.5326<br>(Probable Antigen) | Probable Non-Allergen | Non-Toxin | Positive | Non-Inducer | Inducer     |
| IQRLQIDFSDQVGIF  | L | 0.7923<br>(Probable Antigen) | Probable Non-Allergen | Non-Toxin | Negative | Inducer     | Non-Inducer |
| LWEWYFVEHEPLFST  | L | 0.4470<br>(Probable Antigen) | Probable Non-Allergen | Non-Toxin | Negative | Inducer     | Non-Inducer |
| WEWYFVEHEPLFSTK  | L | 1.1858<br>(Probable Antigen) | Probable Non-Allergen | Non-Toxin | Negative | Inducer     | Non-Inducer |
| SDLTFLISSTIRNLS  | L | 0.8938<br>(Probable Antigen) | Probable Non-Allergen | Non-Toxin | Negative | Inducer     | Non-Inducer |
| LLLVHLSQLARRIKG  | L | 0.4072<br>(Probable Antigen) | Probable Non-Allergen | Non-Toxin | Negative | Non-Inducer | Inducer     |
| LYNIDRLSALLESRR  | L | 0.6889<br>(Probable Antigen) | Probable Non-Allergen | Non-Toxin | Positive | Non-Inducer | Inducer     |
| MLYNIDRLSALLESR  | L | 0.5064<br>(Probable Antigen) | Probable Non-Allergen | Non-Toxin | Positive | Non-Inducer | Inducer     |
| LGFPPLGFNIDISCFK | L | 1.1972<br>(Probable Antigen) | Probable Non-Allergen | Non-Toxin | Positive | Inducer     | Inducer     |
| DILKLNLVIKAVEKG  | L | 0.9642<br>(Probable Antigen) | Probable Non-Allergen | Non-Toxin | Negative | Non-Inducer | Inducer     |
| HILTSIQYDAINHVD  | L | 0.5914<br>(Probable Antigen) | Probable Non-Allergen | Non-Toxin | Negative | Inducer     | Inducer     |
| ILKLNLVIKAVEKGGK | L | 1.1904<br>(Probable Antigen) | Probable Non-Allergen | Non-Toxin | Negative | Non-Inducer | Inducer     |
| KLNLVIKAVEKGKNW  | L | 1.3819<br>(Probable Antigen) | Probable Non-Allergen | Non-Toxin | Positive | Inducer     | Non-Inducer |
| LKLNLVIKAVEKGKN  | L | 1.4523                       | Probable Non-Allergen | Non-Toxin | Negative | Non-Inducer | Non-Inducer |

---

|                 |   |                              |                       |           |          |             |             |
|-----------------|---|------------------------------|-----------------------|-----------|----------|-------------|-------------|
|                 |   | (Probable Antigen)           |                       |           |          |             |             |
| LVIKAVEKGNWSQL  | L | 1.2680<br>(Probable Antigen) | Probable Non-Allergen | Non-Toxin | Positive | Inducer     | Non-Inducer |
| NLVIKAVEKGNWSQ  | L | 1.1835<br>(Probable Antigen) | Probable Non-Allergen | Non-Toxin | Positive | Inducer     | Non-Inducer |
| LILNNTIQITDITN  | L | 1.0772<br>(Probable Antigen) | Probable Non-Allergen | Non-Toxin | Negative | Non-Inducer | Non-Inducer |
| ITTLSPIDAPNDY   | L | 0.4372<br>(Probable Antigen) | Probable Non-Allergen | Non-Toxin | Negative | Non-Inducer | Inducer     |
| EETFVHSGFIYFGKK | L | 0.9345<br>(Probable Antigen) | Probable Non-Allergen | Non-Toxin | Negative | Inducer     | Non-Inducer |
| ETFVHSGFIYFGKKQ | L | 0.8698<br>(Probable Antigen) | Probable Non-Allergen | Non-Toxin | Negative | Inducer     | Inducer     |
| KPEETFVHSGFIYFG | L | 0.6669<br>(Probable Antigen) | Probable Non-Allergen | Non-Toxin | Negative | Inducer     | Non-Inducer |
| LKPEETFVHSGFIYF | L | 0.7039<br>(Probable Antigen) | Probable Non-Allergen | Non-Toxin | Negative | Inducer     | Non-Inducer |
| PEETFVHSGFIYFGK | L | 0.5338<br>(Probable Antigen) | Probable Non-Allergen | Non-Toxin | Negative | Inducer     | Non-Inducer |
| TFVHSGFIYFGKKQY | L | 1.1293<br>(Probable Antigen) | Probable Non-Allergen | Non-Toxin | Negative | Inducer     | Non-Inducer |
| GFKLIKHLEPLCVSC | L | 1.1223<br>(Probable Antigen) | Probable Non-Allergen | Non-Toxin | Negative | Inducer     | Non-Inducer |
| FKYLLPSELVKYANW | L | 0.5906<br>(Probable Antigen) | Probable Non-Allergen | Non-Toxin | Negative | Inducer     | Inducer     |
| IRNAVSLQASKPGLR | L | 0.5861<br>(Probable Antigen) | Probable Non-Allergen | Non-Toxin | Positive | Non-Inducer | Non-Inducer |
| ADYPLDVLGELYNQ  | L | 0.4137<br>(Probable Antigen) | Probable Non-Allergen | Non-Toxin | Negative | Non-Inducer | Non-Inducer |

---

---

|                 |   |                              |                       |           |          |             |             |
|-----------------|---|------------------------------|-----------------------|-----------|----------|-------------|-------------|
| ASKIILNSEINNLNL | L | 0.4184<br>(Probable Antigen) | Probable Non-Allergen | Non-Toxin | Negative | Inducer     | Non-Inducer |
| AVSLQASKPGLRIWY | L | 0.4932<br>(Probable Antigen) | Probable Non-Allergen | Non-Toxin | Positive | Non-Inducer | Non-Inducer |
| DCKELRLEGSNDTEL | L | 0.5149<br>(Probable Antigen) | Probable Non-Allergen | Non-Toxin | Negative | Inducer     | Non-Inducer |
| DGFKLIKHLEPLCVS | L | 0.6625<br>(Probable Antigen) | Probable Non-Allergen | Non-Toxin | Negative | Inducer     | Non-Inducer |
| EGTRLLASRTISLT  | L | 0.6673<br>(Probable Antigen) | Probable Non-Allergen | Non-Toxin | Positive | Non-Inducer | Inducer     |
| FKLIKHLEPLCVSCI | L | 1.0047<br>(Probable Antigen) | Probable Non-Allergen | Non-Toxin | Negative | Inducer     | Non-Inducer |
| GTRLLASRTISLTT  | L | 0.6579<br>(Probable Antigen) | Probable Non-Allergen | Non-Toxin | Positive | Non-Inducer | Inducer     |
| LLASRTISLTTEGTM | L | 0.8657<br>(Probable Antigen) | Probable Non-Allergen | Non-Toxin | Negative | Non-Inducer | Inducer     |
| LRNHFICSLRGKITK | L | 1.0056<br>(Probable Antigen) | Probable Non-Allergen | Non-Toxin | Positive | Inducer     | Non-Inducer |
| NSPLDLRNHFICSL  | L | 1.1905<br>(Probable Antigen) | Probable Non-Allergen | Non-Toxin | Negative | Inducer     | Inducer     |
| PYDCKELRLEGSNDT | L | 0.4188<br>(Probable Antigen) | Probable Non-Allergen | Non-Toxin | Negative | Inducer     | Inducer     |
| RTLLASRTISLTTEG | L | 0.6082<br>(Probable Antigen) | Probable Non-Allergen | Non-Toxin | Negative | Non-Inducer | Non-Inducer |
| SPLDLRNHFICSLR  | L | 1.4076<br>(Probable Antigen) | Probable Non-Allergen | Non-Toxin | Positive | Inducer     | Inducer     |
| TLLASRTISLTTEGT | L | 0.8180<br>(Probable Antigen) | Probable Non-Allergen | Non-Toxin | Negative | Non-Inducer | Inducer     |
| TRTLLASRTISLTTE | L | 0.7087                       | Probable Non-Allergen | Non-Toxin | Negative | Non-Inducer | Inducer     |

---

---

|                 |   |                              |                       |           |          |             |             |
|-----------------|---|------------------------------|-----------------------|-----------|----------|-------------|-------------|
|                 |   | (Probable Antigen)           |                       |           |          |             |             |
| YNIDRLSALLESRRL | L | 0.5492<br>(Probable Antigen) | Probable Non-Allergen | Non-Toxin | Positive | Non-Inducer | Inducer     |
| ELVLTRLAHHIPLIS | L | 0.5039<br>(Probable Antigen) | Probable Non-Allergen | Non-Toxin | Negative | Non-Inducer | Inducer     |
| AIDSNIFQNTINLG  | L | 0.6330<br>(Probable Antigen) | Probable Non-Allergen | Non-Toxin | Negative | Non-Inducer | Inducer     |
| DDLQGSLASIGTSFE | L | 0.6209<br>(Probable Antigen) | Probable Non-Allergen | Non-Toxin | Negative | Inducer     | Non-Inducer |
| DFKYLLPSELVKYAN | L | 0.6683<br>(Probable Antigen) | Probable Non-Allergen | Non-Toxin | Negative | Inducer     | Non-Inducer |
| DLQGSLASIGTSFER | L | 0.6551<br>(Probable Antigen) | Probable Non-Allergen | Non-Toxin | Negative | Inducer     | Inducer     |
| FQILIKSLDAHEDFD | L | 0.6609<br>(Probable Antigen) | Probable Non-Allergen | Non-Toxin | Positive | Inducer     | Inducer     |
| GSLASIGTSFERGTS | L | 0.7559<br>(Probable Antigen) | Probable Non-Allergen | Non-Toxin | Positive | Inducer     | Inducer     |
| KGQRGSLRSNWKFIG | L | 1.2737<br>(Probable Antigen) | Probable Non-Allergen | Non-Toxin | Positive | Inducer     | Non-Inducer |
| LASIGTSFERGTSET | L | 0.6789<br>(Probable Antigen) | Probable Non-Allergen | Non-Toxin | Negative | Inducer     | Inducer     |
| LASIGTSFERGTSET | L | 1.0508<br>(Probable Antigen) | Probable Non-Allergen | Non-Toxin | Negative | Inducer     | Non-Inducer |
| LSDLTFLISSTIRNL | L | 0.8122<br>(Probable Antigen) | Probable Non-Allergen | Non-Toxin | Positive | Inducer     | Non-Inducer |
| NQFCRFTGVVSSMHY | L | 0.4115<br>(Probable Antigen) | Probable Non-Allergen | Non-Toxin | Negative | Inducer     | Non-Inducer |
| PFQILIKSLDAHEDF | L | 0.5955<br>(Probable Antigen) | Probable Non-Allergen | Non-Toxin | Positive | Inducer     | Inducer     |

---

|                 |   |                              |                       |           |          |             |             |
|-----------------|---|------------------------------|-----------------------|-----------|----------|-------------|-------------|
| QGSLASIGTSFERGT | L | 0.7819<br>(Probable Antigen) | Probable Non-Allergen | Non-Toxin | Positive | Inducer     | Inducer     |
| SLASIGTSFERGTSE | L | 0.7704<br>(Probable Antigen) | Probable Non-Allergen | Non-Toxin | Positive | Inducer     | Inducer     |
| SMLAINLLNQHLGF  | L | 1.2843<br>(Probable Antigen) | Probable Non-Allergen | Non-Toxin | Negative | Non-Inducer | Inducer     |
| DLTFLISSTIRNLSH | L | 0.9393<br>(Probable Antigen) | Probable Non-Allergen | Non-Toxin | Negative | Inducer     | Non-Inducer |
| FCRFTGVVSSMHYKL | L | 0.6884<br>(Probable Antigen) | Probable Non-Allergen | Non-Toxin | Negative | Inducer     | Non-Inducer |
| FIKTIVQAKLTPQQY | L | 0.5458<br>(Probable Antigen) | Probable Non-Allergen | Non-Toxin | Negative | Inducer     | Non-Inducer |
| FLISSTIRNLSHRSL | L | 0.4867<br>(Probable Antigen) | Probable Non-Allergen | Non-Toxin | Negative | Inducer     | Non-Inducer |
| FQNTINLGVAVLDIA | L | 0.9731<br>(Probable Antigen) | Probable Non-Allergen | Non-Toxin | Negative | Non-Inducer | Non-Inducer |
| GLRIWYRDQNLTPYL | L | 0.8444<br>(Probable Antigen) | Probable Non-Allergen | Non-Toxin | Negative | Inducer     | Inducer     |
| INNFSCLMKKGQSSL | L | 0.5785<br>(Probable Antigen) | Probable Non-Allergen | Non-Toxin | Negative | Non-Inducer | Non-Inducer |
| KPGLRIWYRDQNLTP | L | 1.0307<br>(Probable Antigen) | Probable Non-Allergen | Non-Toxin | Negative | Inducer     | Inducer     |
| LAINLLNQHLGFPL  | L | 1.1116<br>(Probable Antigen) | Probable Non-Allergen | Non-Toxin | Negative | Non-Inducer | Inducer     |
| LRIWYRDQNLTPYLC | L | 0.5566<br>(Probable Antigen) | Probable Non-Allergen | Non-Toxin | Negative | Inducer     | Inducer     |
| MLAINLLNQHLGFP  | L | 1.0856<br>(Probable Antigen) | Probable Non-Allergen | Non-Toxin | Negative | Non-Inducer | Inducer     |
| RIWYRDQNLTPYLCD | L | 0.4582                       | Probable Non-Allergen | Non-Toxin | Negative | Inducer     | Inducer     |

---

|                 |   |                              |                       |           |          |             |             |
|-----------------|---|------------------------------|-----------------------|-----------|----------|-------------|-------------|
|                 |   | (Probable Antigen)           |                       |           |          |             |             |
| AQITLVELKTKLKLK | L | 1.7562<br>(Probable Antigen) | Probable Non-Allergen | Non-Toxin | Positive | Non-Inducer | Non-Inducer |
| CRFTGVVSSMHYKLY | L | 0.7595<br>(Probable Antigen) | Probable Non-Allergen | Non-Toxin | Negative | Inducer     | Non-Inducer |
| FIYFGKKQYLNGVQL | L | 1.0053<br>(Probable Antigen) | Probable Non-Allergen | Non-Toxin | Negative | Inducer     | Inducer     |
| GFIYFGKKQYLNGVQ | L | 0.8564<br>(Probable Antigen) | Probable Non-Allergen | Non-Toxin | Negative | Inducer     | Inducer     |
| HSGFIYFGKKQYLNG | L | 0.7544<br>(Probable Antigen) | Probable Non-Allergen | Non-Toxin | Negative | Inducer     | Inducer     |
| HSMLAINLLNQHLG  | L | 0.9158<br>(Probable Antigen) | Probable Non-Allergen | Non-Toxin | Negative | Non-Inducer | Inducer     |
| KVQSYVRQGKQHLHS | L | 0.4896<br>(Probable Antigen) | Probable Non-Allergen | Non-Toxin | Negative | Inducer     | Inducer     |
| NNFSCLMKKGQSSLP | L | 0.7308<br>(Probable Antigen) | Probable Non-Allergen | Non-Toxin | Negative | Non-Inducer | Inducer     |
| RFTGVVSSMHYKLYD | L | 0.8414<br>(Probable Antigen) | Probable Non-Allergen | Non-Toxin | Negative | Inducer     | Non-Inducer |
| SGFIYFGKKQYLNGV | L | 0.7480<br>(Probable Antigen) | Probable Non-Allergen | Non-Toxin | Positive | Inducer     | Inducer     |
| VHSGFIYFGKKQYLN | L | 1.0329<br>(Probable Antigen) | Probable Non-Allergen | Non-Toxin | Negative | Inducer     | Inducer     |
| RHELVLTRLAHHIPL | L | 0.4507<br>(Probable Antigen) | Probable Non-Allergen | Non-Toxin | Positive | Non-Inducer | Inducer     |
| CAQITLVELKTKLKL | L | 1.5301<br>(Probable Antigen) | Probable Non-Allergen | Non-Toxin | Positive | Non-Inducer | Non-Inducer |
| FICSLRGKITKYND  | L | 0.4520<br>(Probable Antigen) | Probable Non-Allergen | Non-Toxin | Positive | Non-Inducer | Non-Inducer |

---



|                 |   |                              |                       |           |          |             |             |
|-----------------|---|------------------------------|-----------------------|-----------|----------|-------------|-------------|
| HFICSLRGKITKYNN | L | 0.7511<br>(Probable Antigen) | Probable Non-Allergen | Non-Toxin | Positive | Inducer     | Non-Inducer |
| KLIKHLEPLCVSCIQ | L | 1.0183<br>(Probable Antigen) | Probable Non-Allergen | Non-Toxin | Negative | Inducer     | Inducer     |
| NHFICSLRGKITKYY | L | 0.5004<br>(Probable Antigen) | Probable Non-Allergen | Non-Toxin | Positive | Inducer     | Non-Inducer |
| QFCRFTGVVSSMHYK | L | 0.7152<br>(Probable Antigen) | Probable Non-Allergen | Non-Toxin | Negative | Inducer     | Non-Inducer |
| ARTRLINYGSTALQG | L | 0.8501<br>(Probable Antigen) | Probable Non-Allergen | Non-Toxin | Negative | Non-Inducer | Non-Inducer |
| EINARTRLINYGSTA | L | 1.1732<br>(Probable Antigen) | Probable Non-Allergen | Non-Toxin | Positive | Non-Inducer | Non-Inducer |
| ENITEINARTRLINY | L | 0.8209<br>(Probable Antigen) | Probable Non-Allergen | Non-Toxin | Positive | Inducer     | Non-Inducer |
| INARTRLINYGSTAL | L | 1.1687<br>(Probable Antigen) | Probable Non-Allergen | Non-Toxin | Positive | Non-Inducer | Non-Inducer |
| ITEINARTRLINYG  | L | 1.0891<br>(Probable Antigen) | Probable Non-Allergen | Non-Toxin | Positive | Non-Inducer | Non-Inducer |
| LINYGSTALQGMDTK | L | 0.9352<br>(Probable Antigen) | Probable Non-Allergen | Non-Toxin | Negative | Non-Inducer | Non-Inducer |
| NARTRLINYGSTALQ | L | 1.0194<br>(Probable Antigen) | Probable Non-Allergen | Non-Toxin | Positive | Non-Inducer | Non-Inducer |
| NITEINARTRLINYG | L | 1.3096<br>(Probable Antigen) | Probable Non-Allergen | Non-Toxin | Negative | Inducer     | Non-Inducer |
| RLINYGSTALQGMDT | L | 0.8449<br>(Probable Antigen) | Probable Non-Allergen | Non-Toxin | Negative | Non-Inducer | Non-Inducer |
| TEINARTRLINYGST | L | 1.0864<br>(Probable Antigen) | Probable Non-Allergen | Non-Toxin | Positive | Non-Inducer | Non-Inducer |
| TRLINYGSTALQGMD | L | 0.8943                       | Probable Non-Allergen | Non-Toxin | Negative | Non-Inducer | Non-Inducer |

---

|                 |   |                              |                       |           |          |             |             |
|-----------------|---|------------------------------|-----------------------|-----------|----------|-------------|-------------|
|                 |   | (Probable Antigen)           |                       |           |          |             |             |
| APYIGSRTEKIGYP  | L | 1.1625<br>(Probable Antigen) | Probable Non-Allergen | Non-Toxin | Negative | Inducer     | Inducer     |
| ESLSLSRIKSIKNS  | L | 0.5600<br>(Probable Antigen) | Probable Non-Allergen | Non-Toxin | Negative | Non-Inducer | Non-Inducer |
| ILNNTIQITDITNP  | L | 0.8867<br>(Probable Antigen) | Probable Non-Allergen | Non-Toxin | Negative | Non-Inducer | Non-Inducer |
| NDILKLNLVKAVEK  | L | 0.5062<br>(Probable Antigen) | Probable Non-Allergen | Non-Toxin | Positive | Non-Inducer | Inducer     |
| NIPSISLDPGFRSMS | L | 1.1801<br>(Probable Antigen) | Probable Non-Allergen | Non-Toxin | Negative | Inducer     | Non-Inducer |
| PYIGSRTEKIGYPP  | L | 1.3795<br>(Probable Antigen) | Probable Non-Allergen | Non-Toxin | Negative | Inducer     | Non-Inducer |
| SNIPSISLDPGFRSM | L | 1.0491<br>(Probable Antigen) | Probable Non-Allergen | Non-Toxin | Negative | Inducer     | Non-Inducer |
| YIGSRTEKIGYPPL  | L | 1.2768<br>(Probable Antigen) | Probable Non-Allergen | Non-Toxin | Negative | Inducer     | Non-Inducer |
| FLRQTVRENITITSQ | L | 0.6261<br>(Probable Antigen) | Probable Non-Allergen | Non-Toxin | Positive | Non-Inducer | Non-Inducer |
| HLHSLMLDYENNSPL | L | 0.7562<br>(Probable Antigen) | Probable Non-Allergen | Non-Toxin | Negative | Non-Inducer | Inducer     |
| HSLMLDYENNSPLLD | L | 0.6866<br>(Probable Antigen) | Probable Non-Allergen | Non-Toxin | Positive | Non-Inducer | Inducer     |
| ITFLRQTVRENITIT | L | 0.7998<br>(Probable Antigen) | Probable Non-Allergen | Non-Toxin | Positive | Non-Inducer | Non-Inducer |
| KNHYHSQGSWYKTH  | L | 0.5863<br>(Probable Antigen) | Probable Non-Allergen | Non-Toxin | Negative | Inducer     | Inducer     |
| KQHLHSLMLDYENNS | L | 0.6466<br>(Probable Antigen) | Probable Non-Allergen | Non-Toxin | Negative | Inducer     | Inducer     |

---

|                 |    |                              |                       |           |          |             |             |
|-----------------|----|------------------------------|-----------------------|-----------|----------|-------------|-------------|
| LHSLMLDYENNSPLL | L  | 0.6861<br>(Probable Antigen) | Probable Non-Allergen | Non-Toxin | Negative | Non-Inducer | Inducer     |
| LMLDYENNSPLDLR  | L  | 1.3298<br>(Probable Antigen) | Probable Non-Allergen | Non-Toxin | Positive | Non-Inducer | Inducer     |
| PEFSSHTSSVSSNQQ | L  | 0.4991<br>(Probable Antigen) | Probable Non-Allergen | Non-Toxin | Negative | Non-Inducer | Non-Inducer |
| QHLHSLMLDYENNSP | L  | 0.6963<br>(Probable Antigen) | Probable Non-Allergen | Non-Toxin | Negative | Non-Inducer | Inducer     |
| TFLRQTVRENITITS | L  | 0.4578<br>(Probable Antigen) | Probable Non-Allergen | Non-Toxin | Positive | Non-Inducer | Non-Inducer |
| LVLTRLAHHIPLISL | L  | 0.6962<br>(Probable Antigen) | Probable Non-Allergen | Non-Toxin | Positive | Non-Inducer | Inducer     |
| AEKLEYLAPSYRNFS | L  | 1.1197<br>(Probable Antigen) | Probable Non-Allergen | Non-Toxin | Positive | Inducer     | Inducer     |
| LAWTIGNRAPYIGSR | L  | 1.6783<br>(Probable Antigen) | Probable Non-Allergen | Non-Toxin | Negative | Non-Inducer | Inducer     |
| LGILLLLSIAVLIAL | GP | 0.8179<br>(Probable Antigen) | Probable Non-Allergen | Non-Toxin | Negative | Non-Inducer | Non-Inducer |
| NLGILLLLSIAVLIA | GP | 0.8845<br>(Probable Antigen) | Probable Non-Allergen | Non-Toxin | Negative | Non-Inducer | Non-Inducer |
| ELRIWSVQEDDLAAG | GP | 0.5290<br>(Probable Antigen) | Probable Non-Allergen | Non-Toxin | Negative | Inducer     | Non-Inducer |
| ILIQGTKNLPIL    | GP | 0.7316<br>(Probable Antigen) | Probable Non-Allergen | Non-Toxin | Negative | Non-Inducer | Inducer     |
| ISLILIQGTKNLPIL | GP | 0.8795<br>(Probable Antigen) | Probable Non-Allergen | Non-Toxin | Negative | Non-Inducer | Inducer     |
| LISLILIQGTKNLPI | GP | 0.7123<br>(Probable Antigen) | Probable Non-Allergen | Non-Toxin | Negative | Non-Inducer | Non-Inducer |
| LTNLGILLLLSIAVL | GP | 0.9675                       | Probable Non-Allergen | Non-Toxin | Negative | Non-Inducer | Non-Inducer |

---

|                 |    |                              |                       |           |          |             |             |
|-----------------|----|------------------------------|-----------------------|-----------|----------|-------------|-------------|
|                 |    | (Probable Antigen)           |                       |           |          |             |             |
| TNLGILLLLSIAVLI | GP | 0.9041<br>(Probable Antigen) | Probable Non-Allergen | Non-Toxin | Negative | Non-Inducer | Non-Inducer |
| AQHLVYFRRKRSILW | GP | 1.0689<br>(Probable Antigen) | Probable Non-Allergen | Non-Toxin | Negative | Non-Inducer | Inducer     |
| HLVYFRRKRSILWRE | GP | 0.8434<br>(Probable Antigen) | Probable Non-Allergen | Non-Toxin | Negative | Non-Inducer | Inducer     |
| LVYFRRKRSILWREG | GP | 0.7074<br>(Probable Antigen) | Probable Non-Allergen | Non-Toxin | Negative | Non-Inducer | Inducer     |
| QHLVYFRRKRSILWR | GP | 0.7222<br>(Probable Antigen) | Probable Non-Allergen | Non-Toxin | Negative | Non-Inducer | Inducer     |
| SSTAQHLVYFRRKRS | GP | 0.9310<br>(Probable Antigen) | Probable Non-Allergen | Non-Toxin | Positive | Non-Inducer | Inducer     |
| STAQHLVYFRRKRSI | GP | 0.9100<br>(Probable Antigen) | Probable Non-Allergen | Non-Toxin | Negative | Non-Inducer | Inducer     |
| TAQHLVYFRRKRSIL | GP | 0.9311<br>(Probable Antigen) | Probable Non-Allergen | Non-Toxin | Negative | Non-Inducer | Inducer     |
| AKTCYNISVTDPSGK | GP | 0.8031<br>(Probable Antigen) | Probable Non-Allergen | Non-Toxin | Positive | Inducer     | Non-Inducer |
| KTCYNISVTDPSGKS | GP | 0.8654<br>(Probable Antigen) | Probable Non-Allergen | Non-Toxin | Positive | Inducer     | Non-Inducer |
| YNISVTDPSGKSLLL | GP | 0.5192<br>(Probable Antigen) | Probable Non-Allergen | Non-Toxin | Positive | Inducer     | Inducer     |
| WGAFFLYDRIASTTM | GP | 0.5262<br>(Probable Antigen) | Probable Non-Allergen | Non-Toxin | Positive | Inducer     | Inducer     |
| VLTNLGILLLLSIAV | GP | 0.7683<br>(Probable Antigen) | Probable Non-Allergen | Non-Toxin | Negative | Non-Inducer | Non-Inducer |
| GILLLLSIAVLIALS | GP | 0.6806<br>(Probable Antigen) | Probable Non-Allergen | Non-Toxin | Negative | Non-Inducer | Non-Inducer |

---

|                 |    |                              |                       |           |          |             |             |
|-----------------|----|------------------------------|-----------------------|-----------|----------|-------------|-------------|
| ILLLSIAVLIALSC  | GP | 0.7238<br>(Probable Antigen) | Probable Non-Allergen | Non-Toxin | Negative | Non-Inducer | Non-Inducer |
| NLVCRLRRLANQTAK | GP | 0.4764<br>(Probable Antigen) | Probable Non-Allergen | Non-Toxin | Negative | Inducer     | Non-Inducer |
| IKNQNNLVCRLRRLA | GP | 0.8817<br>(Probable Antigen) | Probable Non-Allergen | Non-Toxin | Negative | Inducer     | Inducer     |
| KNQNNLVCRLRRLAN | GP | 0.7045<br>(Probable Antigen) | Probable Non-Allergen | Non-Toxin | Negative | Inducer     | Inducer     |
| NQNNLVCRLRRLANQ | GP | 0.4656<br>(Probable Antigen) | Probable Non-Allergen | Non-Toxin | Negative | Inducer     | Inducer     |
| QNNLVCRLRRLANQT | GP | 0.4044<br>(Probable Antigen) | Probable Non-Allergen | Non-Toxin | Negative | Inducer     | Inducer     |
| FRRKRSILWREGDMF | GP | 0.5102<br>(Probable Antigen) | Probable Non-Allergen | Non-Toxin | Negative | Non-Inducer | Inducer     |
| VYFRRKRSILWREGD | GP | 0.7696<br>(Probable Antigen) | Probable Non-Allergen | Non-Toxin | Negative | Non-Inducer | Inducer     |
| YFRRKRSILWREGDM | GP | 0.6284<br>(Probable Antigen) | Probable Non-Allergen | Non-Toxin | Negative | Non-Inducer | Inducer     |
| CFLISLILIQGTKNL | GP | 0.9344<br>(Probable Antigen) | Probable Non-Allergen | Non-Toxin | Negative | Non-Inducer | Inducer     |
| FLISLILIQGTKNLP | GP | 0.5244<br>(Probable Antigen) | Probable Non-Allergen | Non-Toxin | Negative | Non-Inducer | Inducer     |
| KTTCFLISLILIQGT | GP | 1.1974<br>(Probable Antigen) | Probable Non-Allergen | Non-Toxin | Negative | Non-Inducer | Inducer     |
| MKTTCFLISLILIQG | GP | 1.0715<br>(Probable Antigen) | Probable Non-Allergen | Non-Toxin | Negative | Non-Inducer | Inducer     |
| TCFLISLILIQGTKN | GP | 0.9546<br>(Probable Antigen) | Probable Non-Allergen | Non-Toxin | Negative | Non-Inducer | Inducer     |
| TTCFLISLILIQGTK | GP | 0.9266<br>(Probable Antigen) | Probable Non-Allergen | Non-Toxin | Negative | Non-Inducer | Inducer     |

---

|                   |    |                              |                       |           |          |             |             |
|-------------------|----|------------------------------|-----------------------|-----------|----------|-------------|-------------|
|                   |    | (Probable Antigen)           |                       |           |          |             |             |
| LLLLSI AVLIALSCI  | GP | 0.8548<br>(Probable Antigen) | Probable Non-Allergen | Non-Toxin | Negative | Non-Inducer | Non-Inducer |
| LLLLSI AVLIALSCIC | GP | 0.8659<br>(Probable Antigen) | Probable Non-Allergen | Non-Toxin | Negative | Non-Inducer | Inducer     |
| LLSI AVLIALSCICR  | GP | 0.6690<br>(Probable Antigen) | Probable Non-Allergen | Non-Toxin | Negative | Non-Inducer | Inducer     |
| AAGLSWIPFFGPGIE   | GP | 0.6265<br>(Probable Antigen) | Probable Non-Allergen | Non-Toxin | Negative | Inducer     | Non-Inducer |
| AGLSWIPFFGPGIEG   | GP | 0.6726<br>(Probable Antigen) | Probable Non-Allergen | Non-Toxin | Negative | Inducer     | Non-Inducer |
| GLSWIPFFGPGIEGL   | GP | 0.6774<br>(Probable Antigen) | Probable Non-Allergen | Non-Toxin | Positive | Inducer     | Non-Inducer |
| LAAGLSWIPFFGPGI   | GP | 0.6551<br>(Probable Antigen) | Probable Non-Allergen | Non-Toxin | Negative | Non-Inducer | Non-Inducer |
| LSWIPFFGPGIEGLY   | GP | 0.7821<br>(Probable Antigen) | Probable Non-Allergen | Non-Toxin | Negative | Inducer     | Non-Inducer |
| SWIPFFGPGIEGLYT   | GP | 0.4479<br>(Probable Antigen) | Probable Non-Allergen | Non-Toxin | Positive | Inducer     | Non-Inducer |
| GVLTNLGILLLLSIA   | GP | 0.8302<br>(Probable Antigen) | Probable Non-Allergen | Non-Toxin | Negative | Non-Inducer | Non-Inducer |
| LIQGTKNLPILEIAS   | GP | 0.5991<br>(Probable Antigen) | Probable Non-Allergen | Non-Toxin | Negative | Non-Inducer | Inducer     |
| IQGTKNLPILEIASN   | GP | 0.5093<br>(Probable Antigen) | Probable Non-Allergen | Non-Toxin | Positive | Inducer     | Inducer     |
| SDWGVLTNLGILLLL   | GP | 0.9342<br>(Probable Antigen) | Probable Non-Allergen | Non-Toxin | Negative | Non-Inducer | Non-Inducer |
| DWGVLTNLGILLLLS   | GP | 1.0409<br>(Probable Antigen) | Probable Non-Allergen | Non-Toxin | Positive | Non-Inducer | Non-Inducer |

---

---

|                 |    |                              |                       |           |          |             |             |
|-----------------|----|------------------------------|-----------------------|-----------|----------|-------------|-------------|
| SKHNFSTLSAPLQNT | GP | 0.4592<br>(Probable Antigen) | Probable Non-Allergen | Non-Toxin | Negative | Non-Inducer | Inducer     |
| LIKNQNNLVCRLRRL | GP | 0.5633<br>(Probable Antigen) | Probable Non-Allergen | Non-Toxin | Negative | Inducer     | Inducer     |
| TSDWGVLTNLGILL  | GP | 0.8542<br>(Probable Antigen) | Probable Non-Allergen | Non-Toxin | Negative | Non-Inducer | Non-Inducer |
| WTSDWGVLTNLGILL | GP | 0.5321<br>(Probable Antigen) | Probable Non-Allergen | Non-Toxin | Negative | Non-Inducer | Non-Inducer |
| WWTSDWGVLTNLGIL | GP | 0.5035<br>(Probable Antigen) | Probable Non-Allergen | Non-Toxin | Negative | Inducer     | Non-Inducer |
| NLPILEIASNNQPQN | GP | 0.4484<br>(Probable Antigen) | Probable Non-Allergen | Non-Toxin | Negative | Inducer     | Inducer     |
| KNLPILEIASNNQPQ | GP | 0.6043<br>(Probable Antigen) | Probable Non-Allergen | Non-Toxin | Negative | Inducer     | Inducer     |
| LPILEIASNNQPQNV | GP | 0.5485<br>(Probable Antigen) | Probable Non-Allergen | Non-Toxin | Negative | Inducer     | Inducer     |

---

**Table S3:** Prediction of potential LBL epitopes from MARV structural proteins.

| <b>Epitopes</b>   | <b>Protein</b> | <b>Probability Score</b> | <b>Antigenicity</b>       | <b>Allergenicity</b>  | <b>Toxicity</b> |
|-------------------|----------------|--------------------------|---------------------------|-----------------------|-----------------|
| DGLINAPIDFDPVPNT  | GP             | 0.9560                   | 0.6448 (Probable Antigen) | Probable Non-Allergen | Non-Toxin       |
| TGCFGALQEYNSTKNQ  | GP             | 0.9815                   | 0.5725 (Probable Antigen) | Probable Non-Allergen | Non-Toxin       |
| PLEASKRWAFRTGVPP  | GP             | 0.9861                   | 0.6999 (Probable Antigen) | Probable Non-Allergen | Non-Toxin       |
| EIKLTSTPTDATKLNT  | GP             | 0.6717                   | 0.9451 (Probable Antigen) | Probable Non-Allergen | Non-Toxin       |
| NVEYTEGEEAKTCYNI  | GP             | 0.9560                   | 0.9577 (Probable Antigen) | Probable Non-Allergen | Non-Toxin       |
| PPLPTARPEIKLTSTP  | GP             | 0.9560                   | 1.1812 (Probable Antigen) | Probable Non-Allergen | Non-Toxin       |
| QGTKNLPILIASNNQ   | GP             | 0.9825                   | 0.5376 (Probable Antigen) | Probable Non-Allergen | Non-Toxin       |
| SSTAQHLVYFRRKRSI  | GP             | 0.7384                   | 0.9044 (Probable Antigen) | Probable Non-Allergen | Non-Toxin       |
| TKLNTTDPSSDDEDLA  | GP             | 0.9560                   | 0.6620 (Probable Antigen) | Probable Non-Allergen | Non-Toxin       |
| AYSGENENDCDAELRI  | GP             | 0.9560                   | 0.8740 (Probable Antigen) | Probable Non-Allergen | Non-Toxin       |
| NISVTDPSGKSLLLDP  | GP             | 0.9560                   | 0.5634 (Probable Antigen) | Probable Non-Allergen | Non-Toxin       |
| GPGIEGLYTAVLIKNQ  | GP             | 0.8288                   | 0.6075 (Probable Antigen) | Probable Non-Allergen | Non-Toxin       |
| GPATTAPNTTNEHFTS  | GP             | 0.9560                   | 0.6081 (Probable Antigen) | Probable Non-Allergen | Non-Toxin       |
| TAKSTSSKKGPAATTAP | GP             | 0.9490                   | 0.4867 (Probable Antigen) | Probable Non-Allergen | Non-Toxin       |
| APSITLPPPTGNPTTA  | GP             | 0.9560                   | 0.4666 (Probable Antigen) | Probable Non-Allergen | Non-Toxin       |
| GLSSTMPPTPSPQPST  | GP             | 0.9560                   | 0.5977 (Probable Antigen) | Probable Non-Allergen | Non-Toxin       |
| PSMPPHNTTITSTNNT  | GP             | 0.9560                   | 0.6622 (Probable Antigen) | Probable Non-Allergen | Non-Toxin       |
| QKVADSPLEASKRWAF  | GP             | 0.9994                   | 0.7064 (Probable Antigen) | Probable Non-Allergen | Non-Toxin       |
| SAEEDQHASPNISSLTL | GP             | 0.9560                   | 1.0235 (Probable Antigen) | Probable Non-Allergen | Non-Toxin       |
| SGTLQKTEDVHLMGFT  | GP             | 0.9560                   | 0.6914 (Probable Antigen) | Probable Non-Allergen | Non-Toxin       |
| PNINENTAYSGENEND  | GP             | 0.9560                   | 0.4339 (Probable Antigen) | Probable Non-Allergen | Non-Toxin       |
| RWAFRTGVPPKNVEYT  | GP             | 0.7485                   | 1.4651 (Probable Antigen) | Probable Non-Allergen | Non-Toxin       |
| AELRIWSVQEDDLAAG  | GP             | 0.4810                   | 0.5106 (Probable Antigen) | Probable Non-Allergen | Non-Toxin       |



|                   |    |        |                           |                       |           |
|-------------------|----|--------|---------------------------|-----------------------|-----------|
| SPNISLTLASYFPNINE | GP | 0.9560 | 0.9563 (Probable Antigen) | Probable Non-Allergen | Non-Toxin |
| TSDAVTKQGLSSTMP   | GP | 0.9560 | 0.4301 (Probable Antigen) | Probable Non-Allergen | Non-Toxin |
| LSWIPFFGPGIEGLYT  | GP | 0.4091 | 0.7445 (Probable Antigen) | Probable Non-Allergen | Non-Toxin |
| GEEAKTCYNISVTDPS  | GP | 0.9560 | 1.0629 (Probable Antigen) | Probable Non-Allergen | Non-Toxin |
| TEERTFSLINRHAI    | GP | 0.9560 | 1.0356 (Probable Antigen) | Probable Non-Allergen | Non-Toxin |
| CFLISLILIQGTKNLP  | GP | 0.7859 | 0.8087 (Probable Antigen) | Probable Non-Allergen | Non-Toxin |
| WWTSDWGVLTNLGILL  | GP | 0.9560 | 0.4645 (Probable Antigen) | Probable Non-Allergen | Non-Toxin |
| LLLRVTTEERTFSLIN  | GP | 0.9560 | 0.8536 (Probable Antigen) | Probable Non-Allergen | Non-Toxin |
| EDDLAAGLSWIPFFGP  | GP | 0.8165 | 0.6954 (Probable Antigen) | Probable Non-Allergen | Non-Toxin |
| SQGSWYKTTTHDLHLTP | L  | 0.9560 | 1.0468 (Probable Antigen) | Probable Non-Allergen | Non-Toxin |
| ASARSQCEDFSPKENP  | L  | 0.9560 | 1.2618 (Probable Antigen) | Probable Non-Allergen | Non-Toxin |
| VSCIQTHGIFTPRKYW  | L  | 0.9560 | 0.4370 (Probable Antigen) | Probable Non-Allergen | Non-Toxin |
| ECFIMIKDVFIERYNT  | L  | 0.9560 | 0.5633 (Probable Antigen) | Probable Non-Allergen | Non-Toxin |
| TRLINYGSTALQGMDT  | L  | 0.9560 | 0.7862 (Probable Antigen) | Probable Non-Allergen | Non-Toxin |
| DESSQSTDPISSGCTK  | L  | 0.9560 | 0.4676 (Probable Antigen) | Probable Non-Allergen | Non-Toxin |
| KTMARCGPLSDSIFDD  | L  | 0.7964 | 0.4477 (Probable Antigen) | Probable Non-Allergen | Non-Toxin |
| RAPYIGSRTEDKIGYP  | L  | 0.9560 | 1.2997 (Probable Antigen) | Probable Non-Allergen | Non-Toxin |
| KTIVQAKLTPQQYCEL  | L  | 0.7869 | 0.9441 (Probable Antigen) | Probable Non-Allergen | Non-Toxin |
| GQHSFMANRMSNTSTR  | L  | 0.9560 | 0.6033 (Probable Antigen) | Probable Non-Allergen | Non-Toxin |
| HQASWHHNSASIGENA  | L  | 0.9560 | 0.7404 (Probable Antigen) | Probable Non-Allergen | Non-Toxin |
| VQMLINTYKRDLHACF  | L  | 0.9560 | 0.4163 (Probable Antigen) | Probable Non-Allergen | Non-Toxin |
| TCISCAQITLVELKTK  | L  | 0.6698 | 1.7780 (Probable Antigen) | Probable Non-Allergen | Non-Toxin |
| SIFIKDRLTAVNQECW  | L  | 0.9560 | 0.9040 (Probable Antigen) | Probable Non-Allergen | Non-Toxin |
| SKPGLRIWYRDQNLTP  | L  | 0.9772 | 1.0176 (Probable Antigen) | Probable Non-Allergen | Non-Toxin |
| ITDITNPLWLDSVIQY  | L  | 0.9560 | 0.4055 (Probable Antigen) | Probable Non-Allergen | Non-Toxin |

|                  |   |        |                           |                       |           |
|------------------|---|--------|---------------------------|-----------------------|-----------|
| LCSGIKGRLGRVSRST | L | 0.4356 | 0.6655 (Probable Antigen) | Probable Non-Allergen | Non-Toxin |
| SELVKYANWDNEFLKA | L | 0.9560 | 0.4396 (Probable Antigen) | Probable Non-Allergen | Non-Toxin |
| VLGYNPPVRFQSKRVP | L | 0.9303 | 0.4089 (Probable Antigen) | Probable Non-Allergen | Non-Toxin |
| HFICSLRGKITKYND  | L | 0.9560 | 0.6122 (Probable Antigen) | Probable Non-Allergen | Non-Toxin |
| RENITITSQNRIINSL | L | 0.3589 | 0.7391 (Probable Antigen) | Probable Non-Allergen | Non-Toxin |
| LVENCRPSEGIRFKDN | L | 0.9560 | 0.6096 (Probable Antigen) | Probable Non-Allergen | Non-Toxin |
| HRYNDQYQGHSFMANR | L | 0.9560 | 0.5658 (Probable Antigen) | Probable Non-Allergen | Non-Toxin |
| YLYVDCSNIPSISLDP | L | 0.9560 | 0.5964 (Probable Antigen) | Probable Non-Allergen | Non-Toxin |
| NSEINNLNLTETLNT  | L | 0.9560 | 0.8187 (Probable Antigen) | Probable Non-Allergen | Non-Toxin |
| KTTHDLHLTPYLRQHI | L | 0.9560 | 1.0592 (Probable Antigen) | Probable Non-Allergen | Non-Toxin |
| TEILDTSPLQSSRYSS | L | 0.9560 | 0.7650 (Probable Antigen) | Probable Non-Allergen | Non-Toxin |
| ITEINARTRLINYGST | L | 0.9560 | 1.0816 (Probable Antigen) | Probable Non-Allergen | Non-Toxin |
| PSKSTRTNHYASLNY  | L | 0.9574 | 0.9957 (Probable Antigen) | Probable Non-Allergen | Non-Toxin |
| RLLWVTQGTADREKLL | L | 0.9560 | 0.5216 (Probable Antigen) | Probable Non-Allergen | Non-Toxin |
| SRTISLTTEGTMLMKL | L | 0.9823 | 0.7295 (Probable Antigen) | Probable Non-Allergen | Non-Toxin |
| LGYLEGTRTLLASRTI | L | 0.4658 | 0.4238 (Probable Antigen) | Probable Non-Allergen | Non-Toxin |
| TELNYVSCALDRKVQ  | L | 0.9560 | 0.8404 (Probable Antigen) | Probable Non-Allergen | Non-Toxin |
| TDLEKYNLAFRYEFTR | L | 0.7356 | 0.4266 (Probable Antigen) | Probable Non-Allergen | Non-Toxin |
| NTKLLTTPTRTEILDT | L | 0.9560 | 0.4905 (Probable Antigen) | Probable Non-Allergen | Non-Toxin |
| ANKVKNTPFSHLINCS | L | 0.9560 | 0.6243 (Probable Antigen) | Probable Non-Allergen | Non-Toxin |
| EREQKEALLHQASWHH | L | 0.9560 | 0.5875 (Probable Antigen) | Probable Non-Allergen | Non-Toxin |
| ASKIILNSEINNLNT  | L | 0.9560 | 0.6683 (Probable Antigen) | Probable Non-Allergen | Non-Toxin |
| NLVIKAVEKGKNWSQL | L | 0.9560 | 1.2110 (Probable Antigen) | Probable Non-Allergen | Non-Toxin |
| WKFIGTDLELFGIADF | L | 0.9560 | 0.8314 (Probable Antigen) | Probable Non-Allergen | Non-Toxin |
| PSVNRLAWTIGNRAPY | L | 0.6156 | 0.7211 (Probable Antigen) | Probable Non-Allergen | Non-Toxin |

|                   |    |        |                           |                       |           |
|-------------------|----|--------|---------------------------|-----------------------|-----------|
| LKEKELNIGRTFGKLP  | L  | 0.9582 | 1.0012 (Probable Antigen) | Probable Non-Allergen | Non-Toxin |
| LGFPSLESSFCHRYTI  | L  | 0.9560 | 0.9815 (Probable Antigen) | Probable Non-Allergen | Non-Toxin |
| SQLVEILPNMH SVCIV | L  | 0.6955 | 0.8902 (Probable Antigen) | Probable Non-Allergen | Non-Toxin |
| EAELNAARVAVELAIT  | L  | 0.4394 | 0.7186 (Probable Antigen) | Probable Non-Allergen | Non-Toxin |
| PPDCANAYHYHLGGIE  | L  | 0.9560 | 0.7941 (Probable Antigen) | Probable Non-Allergen | Non-Toxin |
| LHSLMLDYENNSPLLD  | L  | 0.9560 | 0.6455 (Probable Antigen) | Probable Non-Allergen | Non-Toxin |
| GRVSRSTLSLSLNVSD  | L  | 0.8296 | 0.7438 (Probable Antigen) | Probable Non-Allergen | Non-Toxin |
| EVKWINLSEDLREQFN  | L  | 0.9560 | 1.0834 (Probable Antigen) | Probable Non-Allergen | Non-Toxin |
| ESLSLSRIKSIKNLSD  | L  | 0.5791 | 0.4411 (Probable Antigen) | Probable Non-Allergen | Non-Toxin |
| ISCFKKPLTFSEKLI   | L  | 0.9560 | 0.4425 (Probable Antigen) | Probable Non-Allergen | Non-Toxin |
| GFKLIKHLEPLCVSCI  | L  | 0.9560 | 1.1248 (Probable Antigen) | Probable Non-Allergen | Non-Toxin |
| GVAVLDIALSLAKLSS  | L  | 0.2652 | 0.9786 (Probable Antigen) | Probable Non-Allergen | Non-Toxin |
| IYFGKKQYLNQVQLPQ  | L  | 0.9560 | 0.6350 (Probable Antigen) | Probable Non-Allergen | Non-Toxin |
| LTPQQYCELFSLQKHW  | L  | 0.9560 | 0.8426 (Probable Antigen) | Probable Non-Allergen | Non-Toxin |
| GKRRIQLQIDFSDQV   | L  | 0.9560 | 0.5495 (Probable Antigen) | Probable Non-Allergen | Non-Toxin |
| EKLIALITPQVLGGLS  | L  | 0.4212 | 0.5400 (Probable Antigen) | Probable Non-Allergen | Non-Toxin |
| DELHDLNLKLQISDNK  | L  | 0.9560 | 1.2314 (Probable Antigen) | Probable Non-Allergen | Non-Toxin |
| LELGTKPTAPHVRNKK  | NP | 0.9560 | 1.6432 (Probable Antigen) | Probable Non-Allergen | Non-Toxin |
| EVTVQARPMNRPTALP  | NP | 0.9560 | 1.1868 (Probable Antigen) | Probable Non-Allergen | Non-Toxin |
| REAYELSPDFTNDEDN  | NP | 0.9560 | 0.7736 (Probable Antigen) | Probable Non-Allergen | Non-Toxin |
| MIPGTTSREFQGIPEP  | NP | 0.9560 | 0.6037 (Probable Antigen) | Probable Non-Allergen | Non-Toxin |
| RPTALPPPVDKIEHE   | NP | 0.9560 | 0.8078 (Probable Antigen) | Probable Non-Allergen | Non-Toxin |
| ARHGEYAPFARVLNLS  | NP | 0.7307 | 1.1912 (Probable Antigen) | Probable Non-Allergen | Non-Toxin |
| VNLVTGHDAYDSHISN  | NP | 0.9560 | 0.4523 (Probable Antigen) | Probable Non-Allergen | Non-Toxin |
| PNHWLTTGHMKVIFGI  | NP | 0.4514 | 0.5661 (Probable Antigen) | Probable Non-Allergen | Non-Toxin |

|                  |      |        |                           |                       |           |
|------------------|------|--------|---------------------------|-----------------------|-----------|
| DDKIEHESTEDSSSS  | NP   | 0.9560 | 0.4783 (Probable Antigen) | Probable Non-Allergen | Non-Toxin |
| QEKRDPIQHAAANPQ  | NP   | 0.9560 | 0.5637 (Probable Antigen) | Probable Non-Allergen | Non-Toxin |
| TEDSSSSSFVDLNDP  | NP   | 0.9560 | 0.4848 (Probable Antigen) | Probable Non-Allergen | Non-Toxin |
| DWPDMSFDERRHVAMN | NP   | 0.9560 | 1.2572 (Probable Antigen) | Probable Non-Allergen | Non-Toxin |
| LPPVQEDDESEYTTDS | NP   | 0.9560 | 0.4498 (Probable Antigen) | Probable Non-Allergen | Non-Toxin |
| NSGIDLGDLEGGLLT  | NP   | 0.7440 | 0.8065 (Probable Antigen) | Probable Non-Allergen | Non-Toxin |
| THSQTLAVLSQKREKL | NP   | 0.9560 | 1.0207 (Probable Antigen) | Probable Non-Allergen | Non-Toxin |
| LQRRHEHQEIQAIAED | NP   | 0.9713 | 0.6325 (Probable Antigen) | Probable Non-Allergen | Non-Toxin |
| AHDAEVKLQRRHEHQE | NP   | 0.9560 | 0.9068 (Probable Antigen) | Probable Non-Allergen | Non-Toxin |
| NEQGVDLPPPPLYAQE | NP   | 0.9560 | 0.7914 (Probable Antigen) | Probable Non-Allergen | Non-Toxin |
| DATRFLDVSPNEPHYS | NP   | 0.9560 | 0.7064 (Probable Antigen) | Probable Non-Allergen | Non-Toxin |
| HPAANPQDPFGSIGDV | NP   | 0.9560 | 0.5549 (Probable Antigen) | Probable Non-Allergen | Non-Toxin |
| PNEPHYSPLILALKTL | NP   | 0.9560 | 1.0253 (Probable Antigen) | Probable Non-Allergen | Non-Toxin |
| SSFILKFVLIHQGVNL | NP   | 0.9560 | 0.5680 (Probable Antigen) | Probable Non-Allergen | Non-Toxin |
| QLSAIALGVATAHGST | NP   | 0.6835 | 0.8072 (Probable Antigen) | Probable Non-Allergen | Non-Toxin |
| HGSTLAGVNVGEQYQQ | NP   | 0.9560 | 0.6834 (Probable Antigen) | Probable Non-Allergen | Non-Toxin |
| APFARVLNLSGINNLE | NP   | 0.9560 | 0.6670 (Probable Antigen) | Probable Non-Allergen | Non-Toxin |
| MQYLNPPPYADHGANQ | VP40 | 0.9560 | 0.6465 (Probable Antigen) | Probable Non-Allergen | Non-Toxin |
| TVKKQAYRQHKNPNNG | VP40 | 0.9560 | 0.5081 (Probable Antigen) | Probable Non-Allergen | Non-Toxin |
| QQGITPNYVGDLNLDD | VP40 | 0.9560 | 0.9987 (Probable Antigen) | Probable Non-Allergen | Non-Toxin |
| PAVSIHPNLPPIVLPT | VP40 | 0.9560 | 0.7863 (Probable Antigen) | Probable Non-Allergen | Non-Toxin |
| FSVKEGMMKKRGENSP | VP40 | 0.9560 | 1.0854 (Probable Antigen) | Probable Non-Allergen | Non-Toxin |
| VGDLNLDDQFKGNVCH | VP40 | 0.9560 | 0.5763 (Probable Antigen) | Probable Non-Allergen | Non-Toxin |
| NFEYPLAHTVAALLTG | VP40 | 0.3840 | 0.5328 (Probable Antigen) | Probable Non-Allergen | Non-Toxin |
| VKGVPAWLPLGIMSNF | VP40 | 0.5943 | 0.8720 (Probable Antigen) | Probable Non-Allergen | Non-Toxin |

|                   |      |        |                           |                       |           |
|-------------------|------|--------|---------------------------|-----------------------|-----------|
| KGNVCHAFTLEAIIDI  | VP40 | 0.9560 | 0.4174 (Probable Antigen) | Probable Non-Allergen | Non-Toxin |
| AALTRLSRTFDAFLGV  | VP35 | 0.8740 | 0.5738 (Probable Antigen) | Probable Non-Allergen | Non-Toxin |
| ELSEETFSPNLSAKD   | VP35 | 0.9143 | 0.6448 (Probable Antigen) | Probable Non-Allergen | Non-Toxin |
| PFHILAQVLSKIAYKS  | VP35 | 0.3931 | 0.7557 (Probable Antigen) | Probable Non-Allergen | Non-Toxin |
| SYMQQVSEGLMTGKVP  | VP35 | 0.7727 | 0.4743 (Probable Antigen) | Probable Non-Allergen | Non-Toxin |
| LSEVTTRVHEIERQLH  | VP35 | 0.8999 | 0.4257 (Probable Antigen) | Probable Non-Allergen | Non-Toxin |
| AFLGVVPPVIRVKNFQ  | VP35 | 0.9560 | 1.0892 (Probable Antigen) | Probable Non-Allergen | Non-Toxin |
| NRQISDIQSTLSEVTT  | VP35 | 0.9560 | 0.6822 (Probable Antigen) | Probable Non-Allergen | Non-Toxin |
| KRTLADLLIPINRQIS  | VP35 | 0.9560 | 0.4187 (Probable Antigen) | Probable Non-Allergen | Non-Toxin |
| GMTLLHHLKSNFVVPE  | VP24 | 0.9560 | 0.4240 (Probable Antigen) | Probable Non-Allergen | Non-Toxin |
| PSVGGWTVKWGNFVFH  | VP24 | 0.9560 | 1.3286 (Probable Antigen) | Probable Non-Allergen | Non-Toxin |
| SAIHISPNLLGIYLTS  | VP24 | 0.9560 | 1.1179 (Probable Antigen) | Probable Non-Allergen | Non-Toxin |
| PFLALRILLGVALKDQ  | VP24 | 0.6817 | 1.2081 (Probable Antigen) | Probable Non-Allergen | Non-Toxin |
| RYNLPANVTENSINLD  | VP24 | 0.9560 | 0.4741 (Probable Antigen) | Probable Non-Allergen | Non-Toxin |
| PPPPKDMCRNMKIGLP  | VP30 | 0.9560 | 0.8032 (Probable Antigen) | Probable Non-Allergen | Non-Toxin |
| RNMKIGLPCADPTCNR  | VP30 | 0.9560 | 1.3570 (Probable Antigen) | Probable Non-Allergen | Non-Toxin |
| RARMSSTRSSAESSP   | VP30 | 0.9560 | 0.8008 (Probable Antigen) | Probable Non-Allergen | Non-Toxin |
| SKPHYTNYHPRARSMS  | VP30 | 0.9560 | 1.2354 (Probable Antigen) | Probable Non-Allergen | Non-Toxin |
| RNHQVTPTIYHETQLP  | VP30 | 0.9560 | 0.6913 (Probable Antigen) | Probable Non-Allergen | Non-Toxin |
| NGVIKQTYTGIHLDKG  | VP30 | 0.7669 | 0.7316 (Probable Antigen) | Probable Non-Allergen | Non-Toxin |
| ESSISVQASYDHFILP  | VP30 | 0.9560 | 0.6557 (Probable Antigen) | Probable Non-Allergen | Non-Toxin |
| YVMNNIPCESSISVQA  | VP30 | 0.2019 | 0.4752 (Probable Antigen) | Probable Non-Allergen | Non-Toxin |
| AGIRKTNRSLINTMTE  | VP30 | 0.9560 | 0.4873 (Probable Antigen) | Probable Non-Allergen | Non-Toxin |
| HRSEIGKLDDETSLRAA | VP30 | 0.9065 | 0.5694 (Probable Antigen) | Probable Non-Allergen | Non-Toxin |
| PTIYHETQLPSKPHYT  | VP30 | 0.8398 | 0.5784 (Probable Antigen) | Probable Non-Allergen | Non-Toxin |

---

|                  |      |        |                           |                       |           |
|------------------|------|--------|---------------------------|-----------------------|-----------|
| TNRELLLLMARKMLPN | VP30 | 0.8113 | 0.5038 (Probable Antigen) | Probable Non-Allergen | Non-Toxin |
| RDHDLNLTNRELLL   | VP30 | 0.4512 | 0.9756 (Probable Antigen) | Probable Non-Allergen | Non-Toxin |
| KQEQTkdVLTLENLGH | VP30 | 0.9560 | 0.5237 (Probable Antigen) | Probable Non-Allergen | Non-Toxin |

---

**Table S4:** Worldwide population coverage analysis based on MHC restriction data.

| Population/Area | MHC I                    |                          |                   | MHC II                   |                          |                   | MHC I and MHC II Combined |                          |                   |
|-----------------|--------------------------|--------------------------|-------------------|--------------------------|--------------------------|-------------------|---------------------------|--------------------------|-------------------|
|                 | Coverage(%) <sup>a</sup> | Average hit <sup>b</sup> | PC90 <sup>c</sup> | Coverage(%) <sup>a</sup> | Average hit <sup>b</sup> | PC90 <sup>c</sup> | Coverage(%) <sup>a</sup>  | Average hit <sup>b</sup> | PC90 <sup>c</sup> |
| Central Africa  | 81.71%                   | 2.32                     | 0.55              | 51.30%                   | 0.59                     | 0.21              | 91.09%                    | 2.91                     | 1.05              |
| Central America | 5.69%                    | 0.1                      | 0.11              | 37.16%                   | 0.39                     | 0.16              | 40.73%                    | 0.49                     | 0.17              |
| East Africa     | 87.39%                   | 2.78                     | 0.79              | 44.35%                   | 0.49                     | 0.18              | 92.98%                    | 3.27                     | 1.18              |
| East Asia       | 92.99%                   | 3.22                     | 1.19              | 46.83%                   | 0.53                     | 0.19              | 96.27%                    | 3.75                     | 1.56              |
| Europe          | 98.39%                   | 4.56                     | 1.96              | 52.11%                   | 0.6                      | 0.21              | 99.23%                    | 5.15                     | 2.43              |
| North Africa    | 89.71%                   | 2.96                     | 0.97              | 51.94%                   | 0.61                     | 0.21              | 95.05%                    | 3.57                     | 1.35              |
| North America   | 95.70%                   | 3.68                     | 1.41              | 57.91%                   | 0.68                     | 0.24              | 98.19%                    | 4.35                     | 2.02              |
| Northeast Asia  | 93.11%                   | 2.7                      | 1.16              | 32.27%                   | 0.35                     | 0.15              | 95.33%                    | 3.05                     | 1.34              |
| Oceania         | 83.92%                   | 2.27                     | 0.62              | 34.86%                   | 0.38                     | 0.15              | 89.52%                    | 2.65                     | 0.95              |
| South Africa    | 92.33%                   | 3.26                     | 1.13              | 29.10%                   | 0.3                      | 0.14              | 94.56%                    | 3.56                     | 1.3               |
| South America   | 76.48%                   | 1.82                     | 0.43              | 41.41%                   | 0.46                     | 0.17              | 86.22%                    | 2.28                     | 0.73              |
| South Asia      | 89.47%                   | 2.76                     | 0.95              | 46.65%                   | 0.56                     | 0.19              | 94.38%                    | 3.32                     | 1.27              |
| Southeast Asia  | 90.95%                   | 2.59                     | 1.05              | 30.48%                   | 0.34                     | 0.14              | 93.71%                    | 2.93                     | 1.22              |
| Southwest Asia  | 89.37%                   | 2.85                     | 0.94              | 26.59%                   | 0.29                     | 0.14              | 92.20%                    | 3.14                     | 1.12              |
| West Africa     | 88.19%                   | 3.02                     | 0.85              | 65.24%                   | 0.79                     | 0.29              | 95.89%                    | 3.82                     | 1.48              |
| West Indies     | 92.42%                   | 3.35                     | 1.14              | 41.41%                   | 0.46                     | 0.17              | 95.56%                    | 3.81                     | 1.43              |
| World           | 95.75%                   | 3.68                     | 1.4               | 51.08%                   | 0.58                     | 0.2               | 97.92%                    | 4.26                     | 1.89              |

**Notes:** <sup>a</sup>Projected population coverage.

<sup>b</sup>Average number of epitope hits/HLA combinations recognized by the population.

<sup>c</sup>Minimum number of epitope hits/HLA combinations recognized by 90% of the population

**Table S5:** Refined vaccine models generated by GalaxyRefine server.

| <b>Model</b> | <b>GDT-HA</b> | <b>RMSD</b> | <b>MolProbity</b> | <b>Clash score</b> | <b>Poor rotamers</b> | <b>Rama favored</b> |
|--------------|---------------|-------------|-------------------|--------------------|----------------------|---------------------|
| Initial      | 1             | 0           | 4.857             | 299.3              | 84.5                 | 92.6                |
| MODEL 1      | 0.9156        | 0.51        | 2.213             | 22.2               | 1.2                  | 95.4                |
| MODEL 2      | 0.9091        | 0.519       | 2.117             | 22.1               | 0.7                  | 95.9                |
| MODEL 3      | 0.9142        | 0.504       | 2.125             | 21.7               | 0.9                  | 95.7                |
| MODEL 4      | 0.9156        | 0.509       | 2.086             | 21.2               | 0.7                  | 96.1                |
| MODEL 5      | 0.9128        | 0.509       | 2.13              | 21.2               | 0.9                  | 95.6                |



**Table S6:** List of amino acid residues in disulfide engineering.

| Residue 1 |       |     | Residue 2 |       |     | Bond     |        |                 |
|-----------|-------|-----|-----------|-------|-----|----------|--------|-----------------|
| Chain     | Seq # | AA  | Chain     | Seq # | AA  | $\chi^3$ | Energy | $\sum$ B-Factor |
| A         | 89    | GLY | A         | 92    | GLU | 125.38   | 4.97   | 0               |
| A         | 120   | LEU | A         | 125   | ALA | 111.98   | 5.66   | 0               |
| A         | 145   | ALA | A         | 168   | MET | -113.61  | 4.78   | 0               |
| A         | 146   | ALA | A         | 166   | VAL | 114.04   | 3.81   | 0               |
| A         | 157   | ALA | A         | 166   | VAL | 106.69   | 4.79   | 0               |
| A         | 160   | PHE | A         | 164   | ARG | 123.39   | 3.38   | 0               |
| A         | 160   | PHE | A         | 188   | LEU | 98.64    | 4.78   | 0               |
| A         | 165   | HIS | A         | 185   | THR | 75.13    | 7.06   | 0               |
| A         | 166   | VAL | A         | 188   | LEU | -108.19  | 5.84   | 0               |
| A         | 169   | ALA | A         | 210   | THR | -82.05   | 2.34   | 0               |
| A         | 170   | ALA | A         | 181   | ALA | 82.51    | 6.92   | 0               |
| A         | 171   | TYR | A         | 213   | GLY | -105.63  | 2.53   | 0               |
| A         | 182   | ALA | A         | 214   | ILE | 110.99   | 2.28   | 0               |
| A         | 208   | SER | A         | 252   | PHE | -74.24   | 5.47   | 0               |
| A         | 212   | ALA | A         | 253   | ASN | -101.5   | 4.55   | 0               |
| A         | 242   | PRO | A         | 249   | PRO | 110.15   | 3.04   | 0               |
| A         | 257   | SER | A         | 276   | ILE | -90.4    | 7.12   | 0               |
| A         | 269   | LEU | A         | 272   | ARG | 81.84    | 1.08   | 0               |
| A         | 274   | HIS | A         | 297   | PHE | -98.88   | 7.18   | 0               |
| A         | 275   | PHE | A         | 295   | LEU | 85.2     | 6.61   | 0               |
| A         | 279   | LEU | A         | 291   | ILE | -111.86  | 8.65   | 0               |
| A         | 283   | GLY | A         | 365   | GLY | -86.62   | 1.49   | 0               |
| A         | 299   | SER | A         | 302   | PRO | 111.15   | 2.61   | 0               |
| A         | 317   | PRO | A         | 327   | VAL | -72.59   | 3.24   | 0               |
| A         | 320   | LEU | A         | 349   | PRO | -80.82   | 5.13   | 0               |
| A         | 320   | LEU | A         | 359   | ALA | 99.33    | 3.91   | 0               |
| A         | 321   | GLY | A         | 339   | ILE | -80.07   | 4.92   | 0               |
| A         | 330   | ASP | A         | 333   | LYS | 89.66    | 1.57   | 0               |
| A         | 334   | PRO | A         | 354   | GLY | 82.49    | 2.6    | 0               |
| A         | 343   | GLY | A         | 362   | PRO | 121.54   | 5.39   | 0               |
| A         | 393   | LYS | A         | 427   | LYS | -105.83  | 4.17   | 0               |
| A         | 400   | LYS | A         | 403   | ALA | -88.77   | 2.45   | 0               |
| A         | 419   | ASP | A         | 422   | HIS | 103.26   | 0.76   | 0               |
| A         | 424   | LEU | A         | 443   | PRO | 124.11   | 3.82   | 0               |
| A         | 428   | LEU | A         | 439   | LEU | 120.43   | 2.19   | 0               |
| A         | 431   | SER | A         | 435   | LYS | 92.98    | 3.01   | 0               |
| A         | 440   | GLY | A         | 471   | LYS | 105.22   | 6.27   | 0               |
| A         | 442   | LYS | A         | 473   | PHE | 70.47    | 8.24   | 0               |
| A         | 468   | ALA | A         | 492   | PHE | -95.84   | 0.75   | 0               |

---

|   |     |     |   |     |     |        |      |   |
|---|-----|-----|---|-----|-----|--------|------|---|
| A | 471 | LYS | A | 497 | PRO | -80.16 | 3.23 | 0 |
| A | 499 | VAL | A | 518 | TRP | 91.87  | 5.53 | 0 |
| A | 502 | VAL | A | 516 | VAL | 121.24 | 4.85 | 0 |
| A | 515 | THR | A | 524 | HIS | 97.82  | 4.87 | 0 |
| A | 517 | LYS | A | 522 | VAL | 98.18  | 4.95 | 0 |
| A | 525 | LYS | A | 528 | LYS | 125.78 | 4.26 | 0 |

---

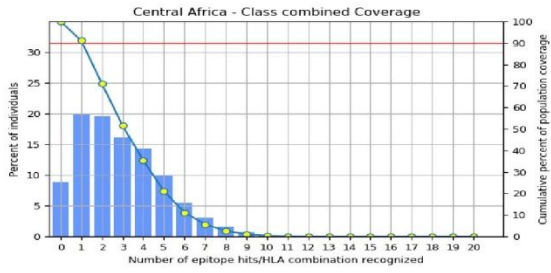

(A)

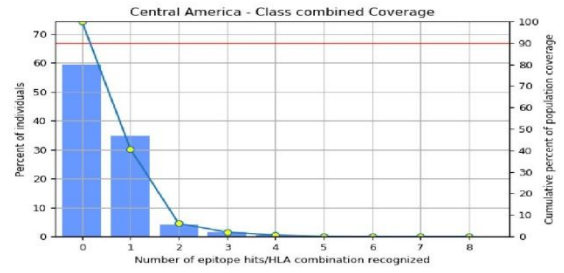

(B)

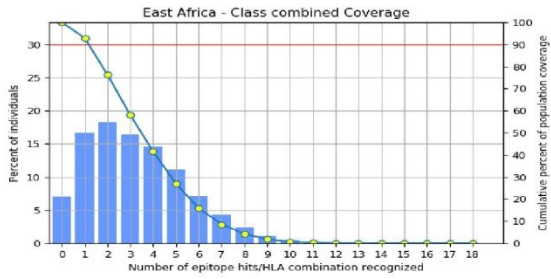

(C)

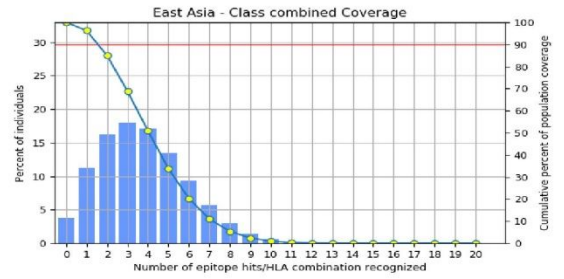

(D)

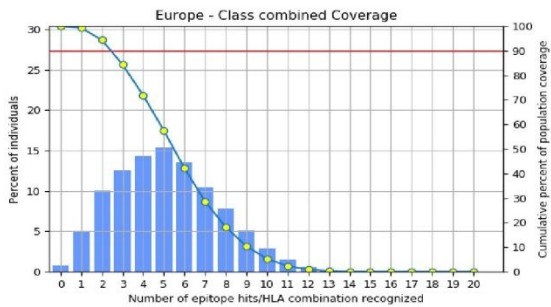

(E)

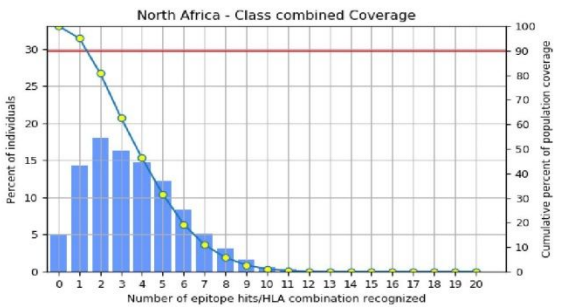

(F)

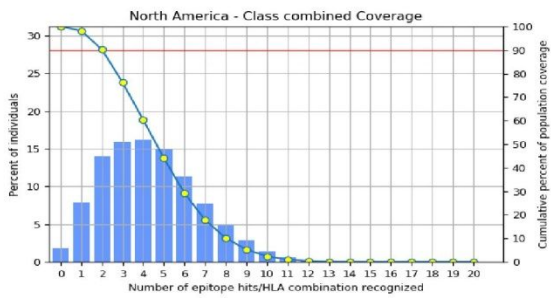

(G)

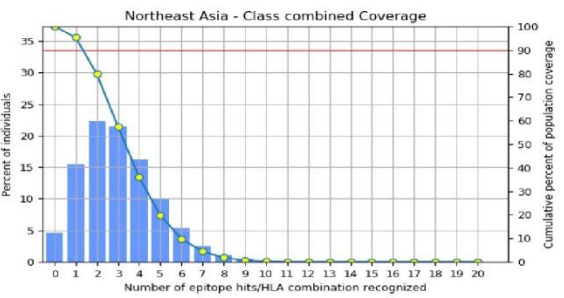

(H)

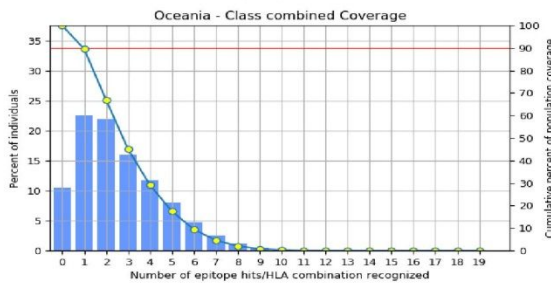

(I)

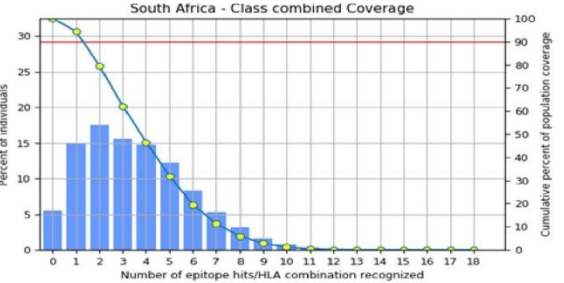

(J)

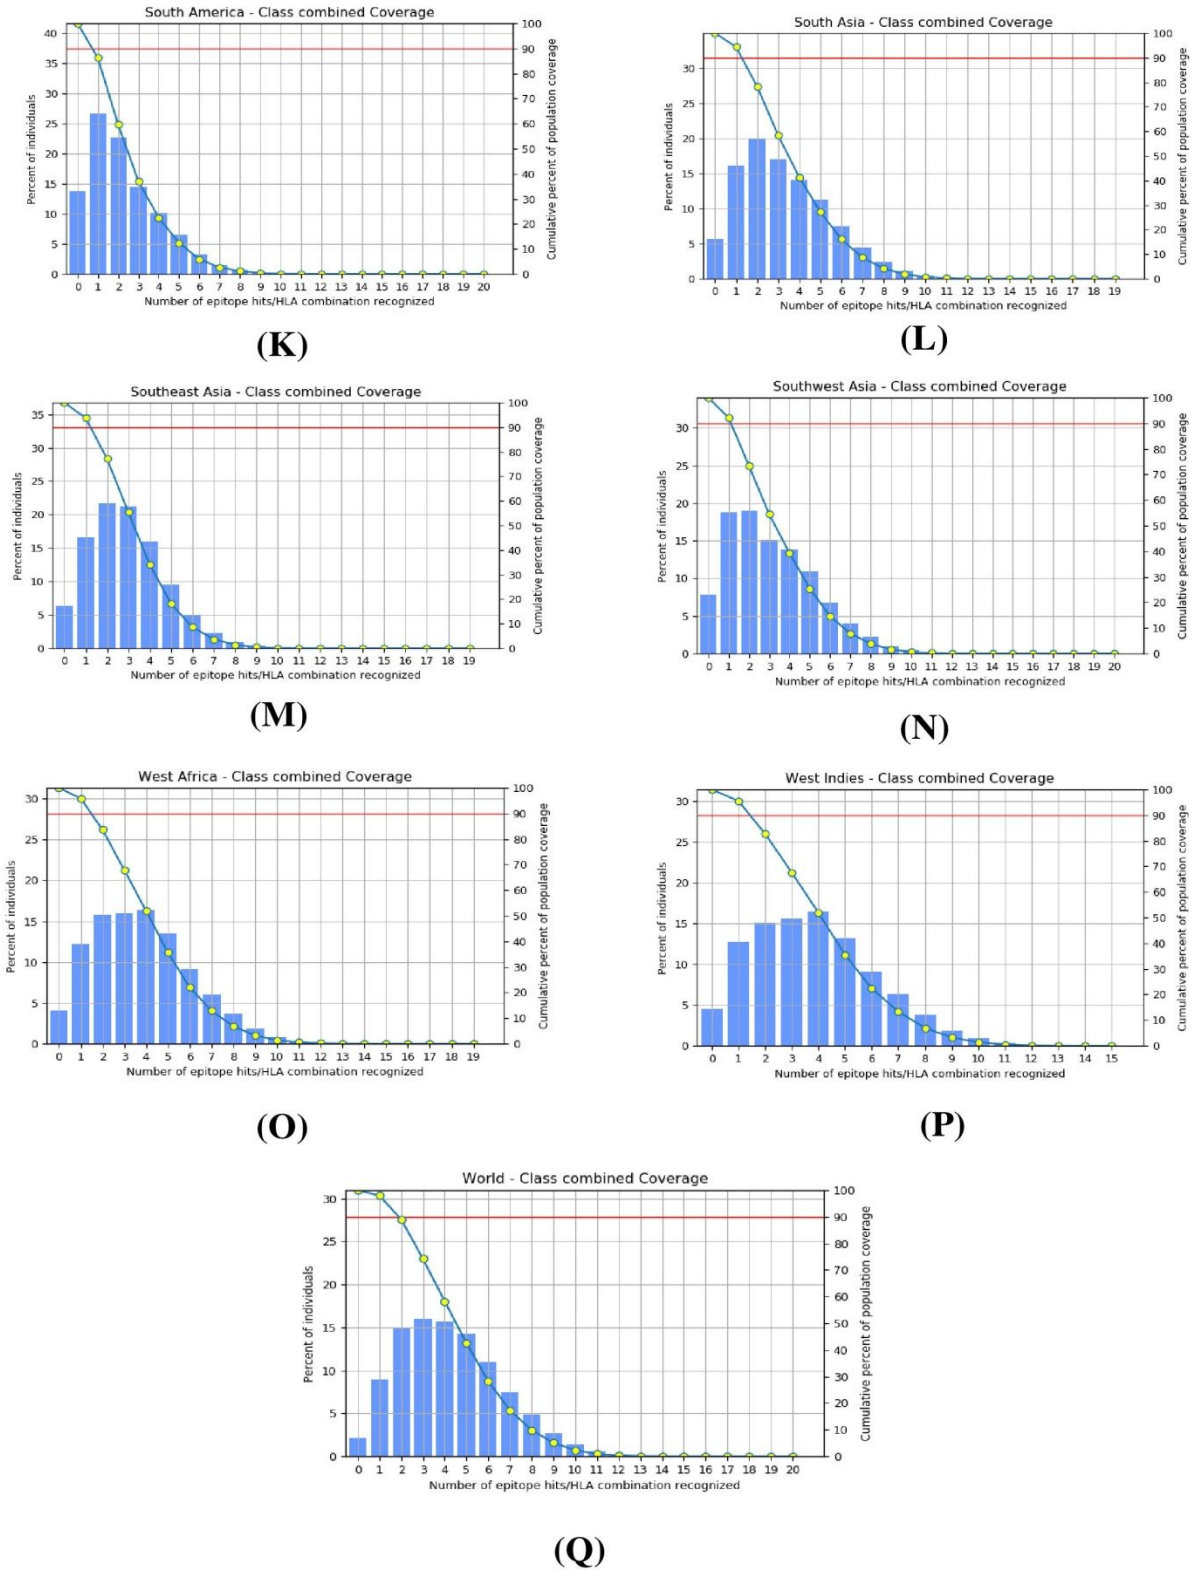

**Figure S1:** Population/HLA coverage analysis of the shortlisted epitopes based on combined MHCI and MHCII restriction data for (A) Central Africa, (B) Central America, (C) East Africa, (D) East Asia, (E) Europe, (F) North Africa, (G) North America, (H) Northeast Asia, (I) Oceania, (J) South Africa, (K) South America, (L) South Asia, (M) Southeast Asia, (N) Southwest Asia, (O) West Africa, (P) West Indies, and (Q) World- using the IEDB analysis resource.

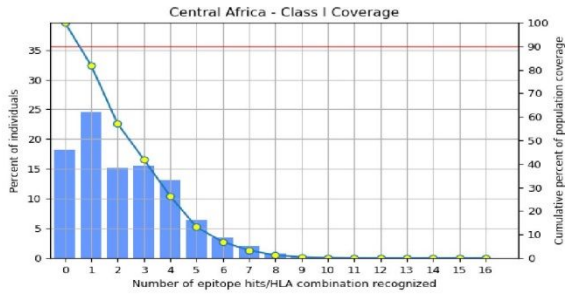

(A)

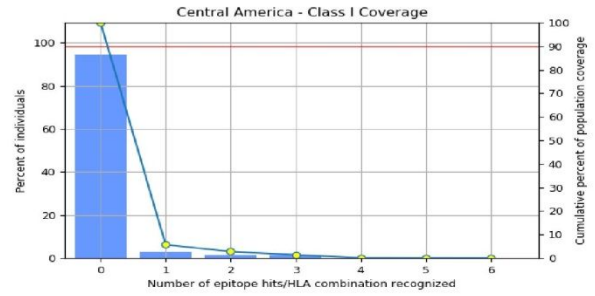

(B)

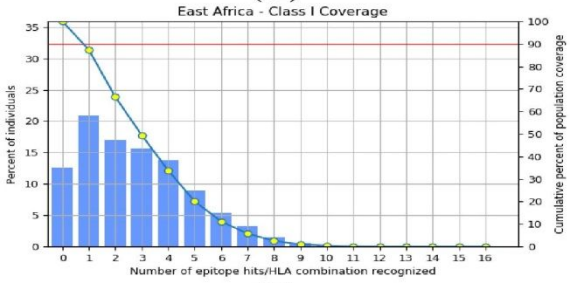

(C)

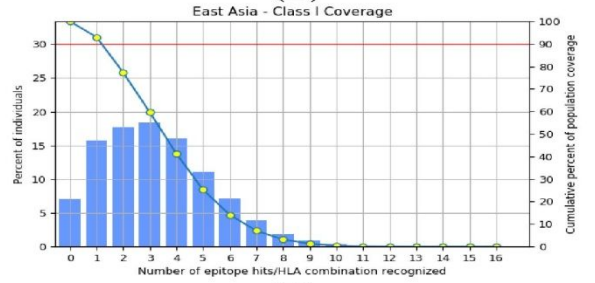

(D)

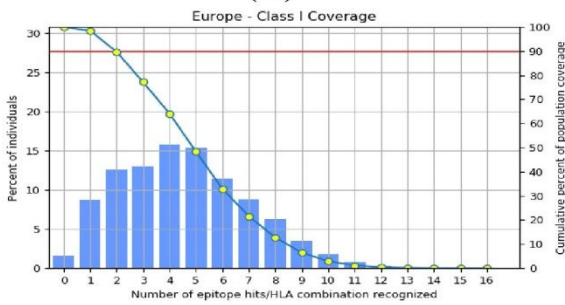

(E)

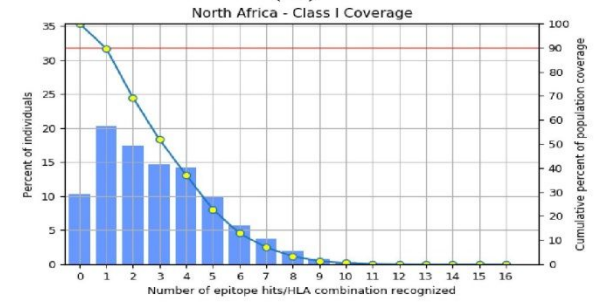

(F)

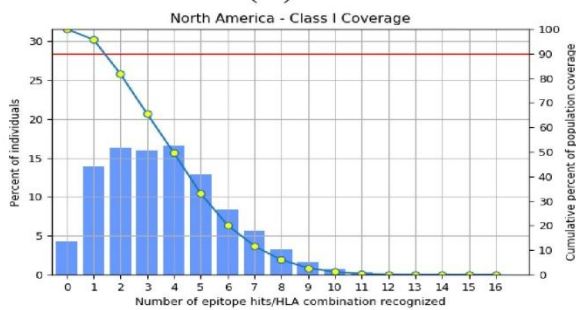

(G)

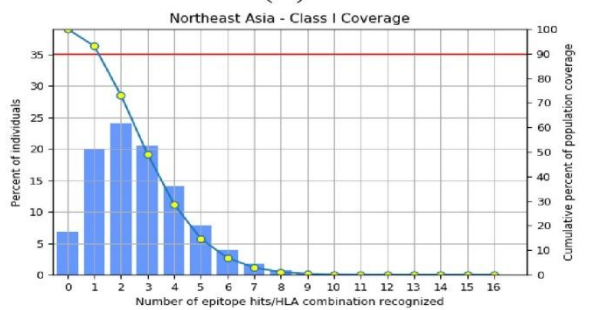

(H)

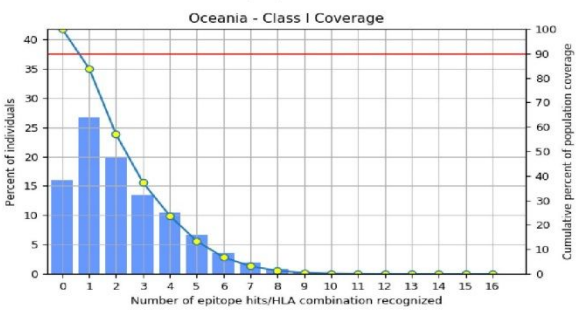

(I)

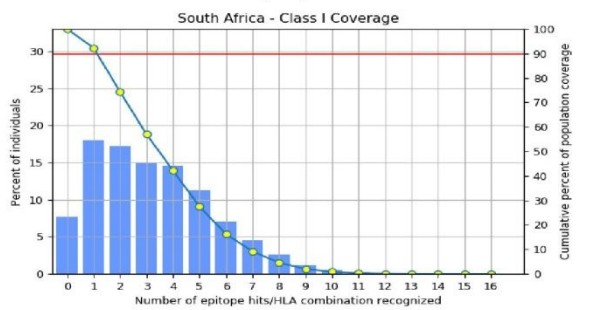

(J)

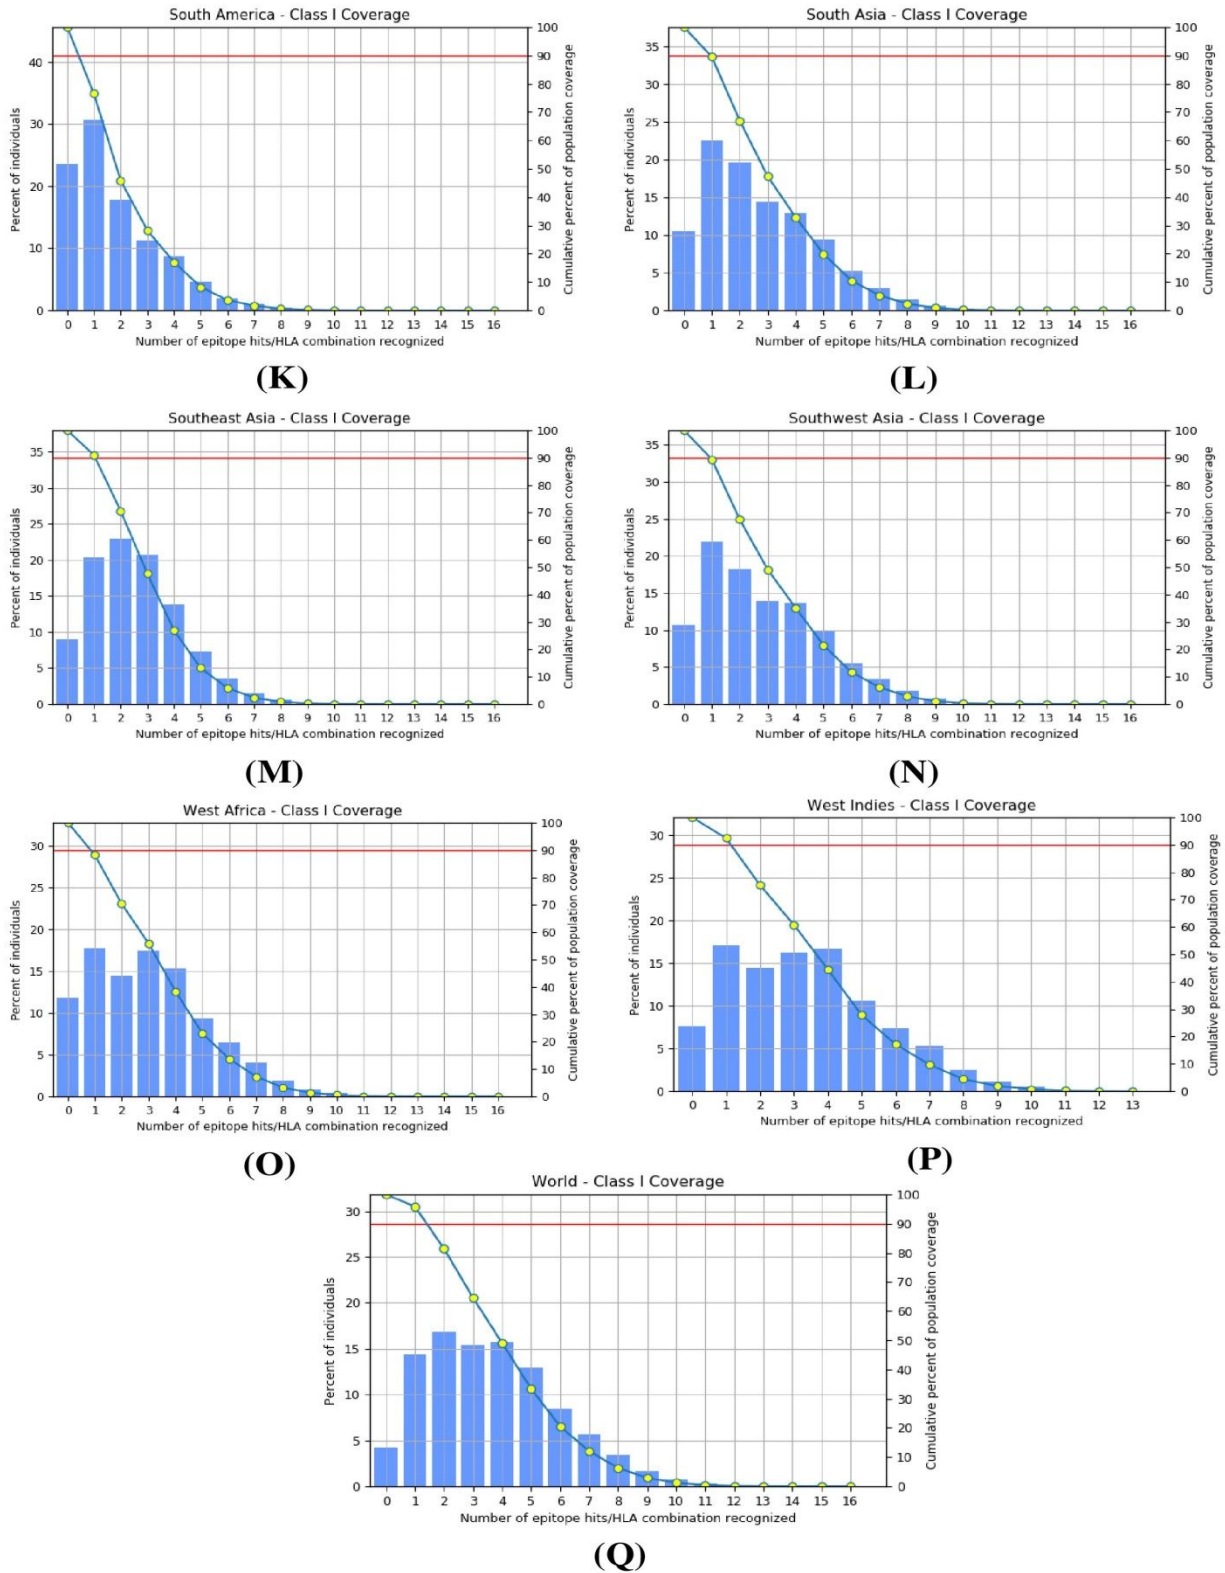

**Figure S2:** Population coverage analysis of the shortlisted epitopes based on MHC I restriction data for (A) Central Africa, (B) Central America, (C) East Africa, (D) East Asia, (E) Europe, (F) North Africa, (G) North America, (H) Northeast Asia, (I) Oceania, (J) South Africa, (K) South America, (L) South Asia, (M) Southeast Asia, (N) Southwest Asia, (O) West Africa, (P) West Indies, and (Q) World- using the IEDB analysis resource.

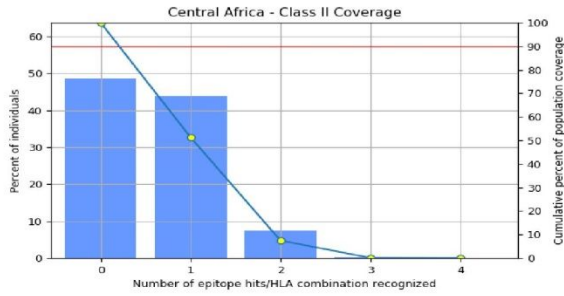

(A)

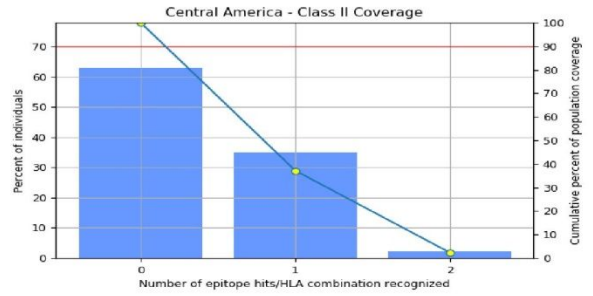

(B)

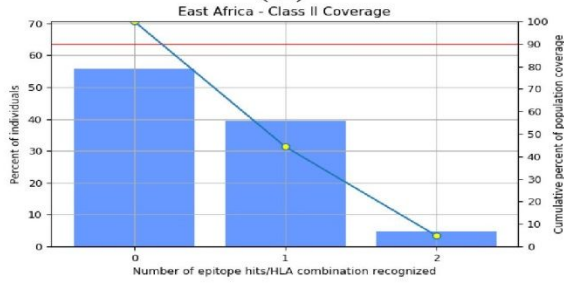

(C)

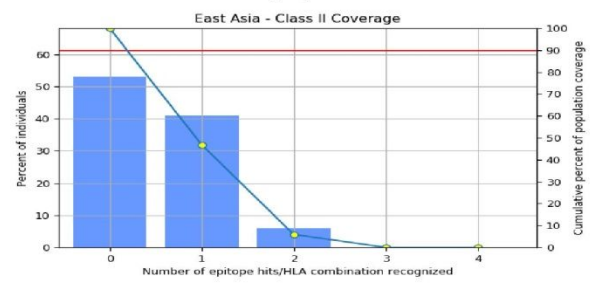

(D)

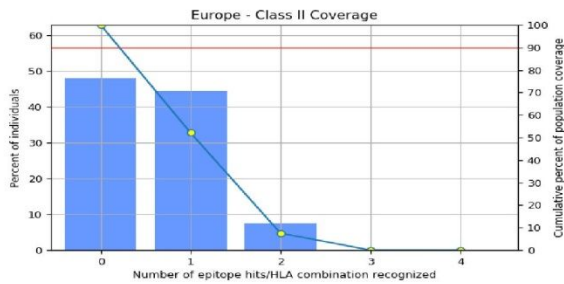

(E)

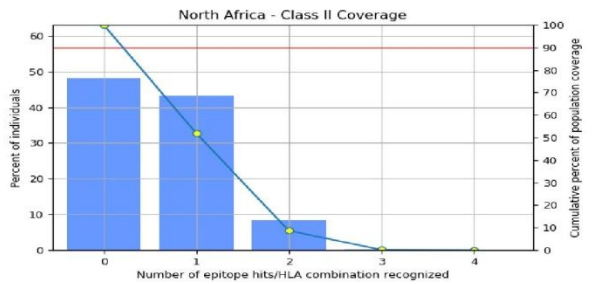

(F)

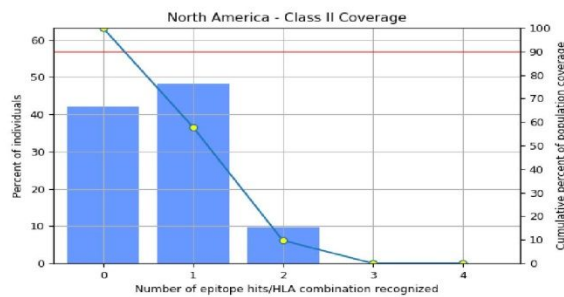

(G)

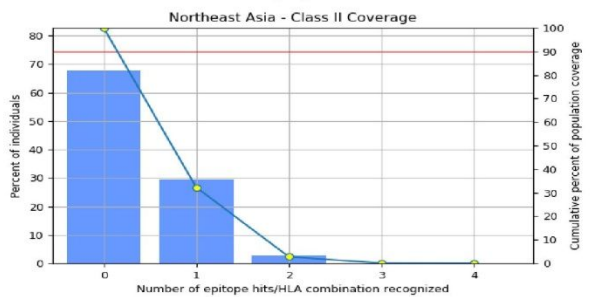

(H)

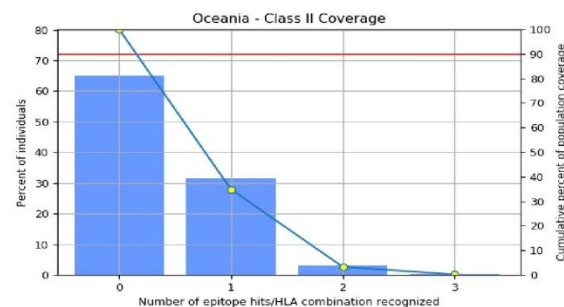

(I)

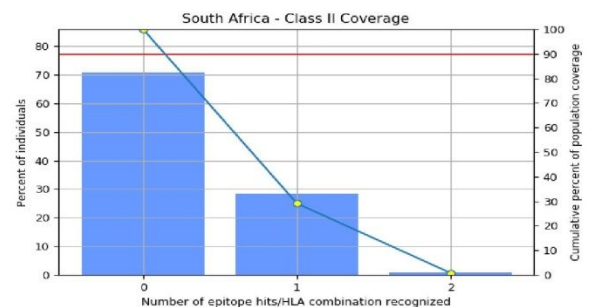

(J)

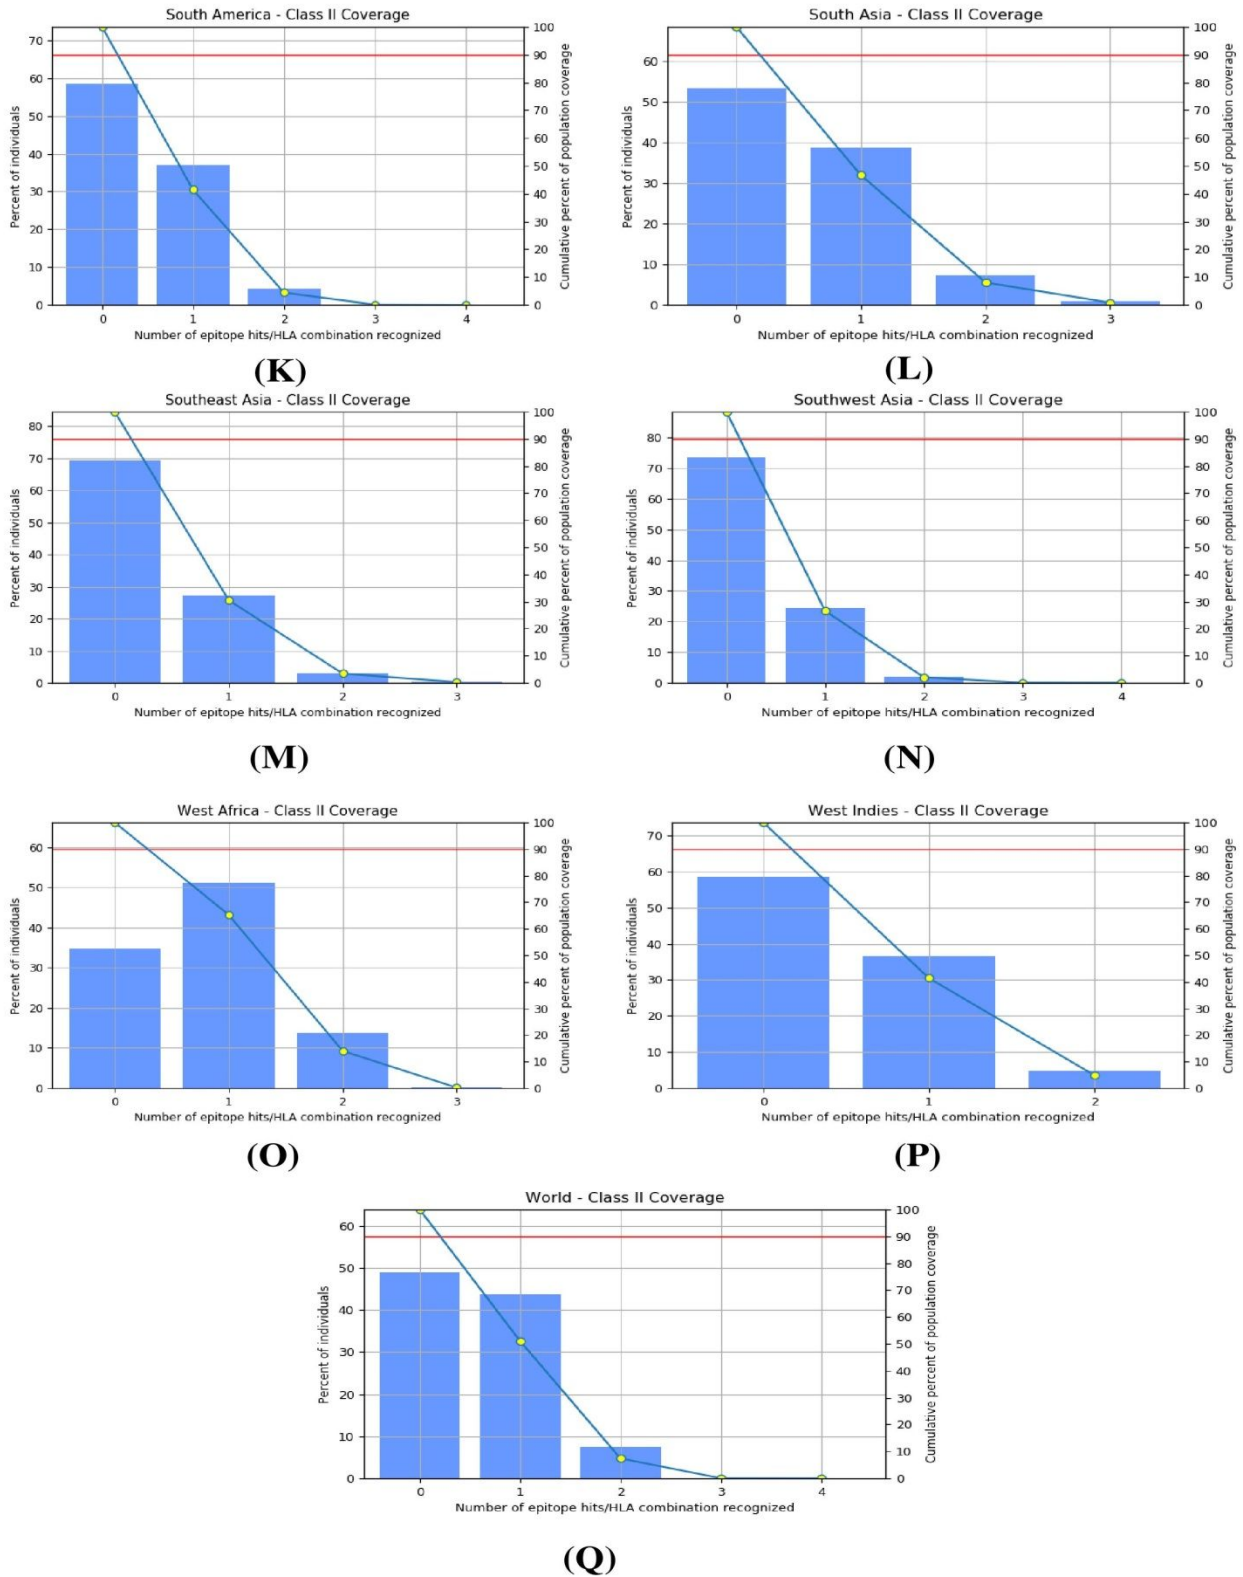

**Figure S3:** Population coverage analysis of the shortlisted epitopes based on MHCII restriction data for (A) Central Africa, (B) Central America, (C) East Africa, (D) East Asia, (E) Europe, (F) North Africa, (G) North America, (H) Northeast Asia, (I) Oceania, (J) South Africa, (K) South America, (L) South Asia, (M) Southeast Asia, (N) Southwest Asia, (O) West Africa, (P) West Indies, and (Q) World- using the IEDB analysis resource.



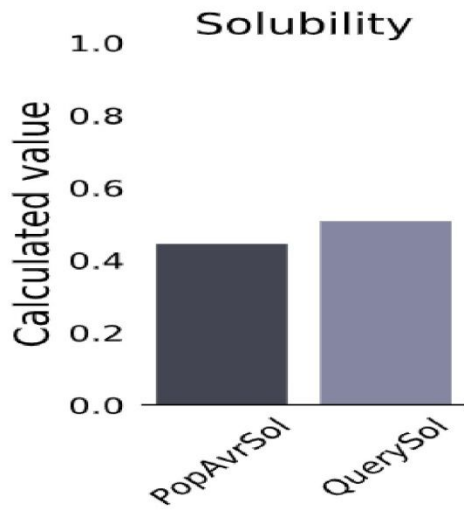

(A)

Sequence length : 542

---

SOPMA :

|                            |                 |
|----------------------------|-----------------|
| Alpha helix (Hh)           | : 199 is 36.72% |
| 3 <sub>10</sub> helix (Gg) | : 0 is 0.00%    |
| Pi helix (Ii)              | : 0 is 0.00%    |
| Beta bridge (Bb)           | : 0 is 0.00%    |
| Extended strand (Ee)       | : 98 is 18.08%  |
| Beta turn (Tt)             | : 0 is 0.00%    |
| Bend region (Ss)           | : 0 is 0.00%    |
| Random coil (Cc)           | : 245 is 45.20% |
| Ambiguous states (?)       | : 0 is 0.00%    |
| Other states               | : 0 is 0.00%    |

(B)

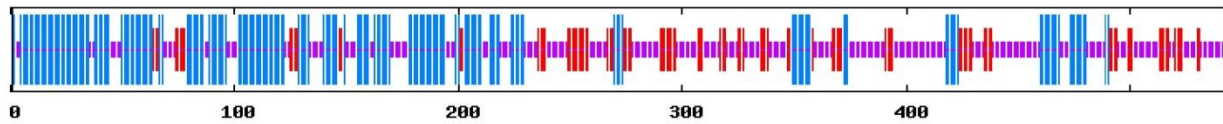

(C)

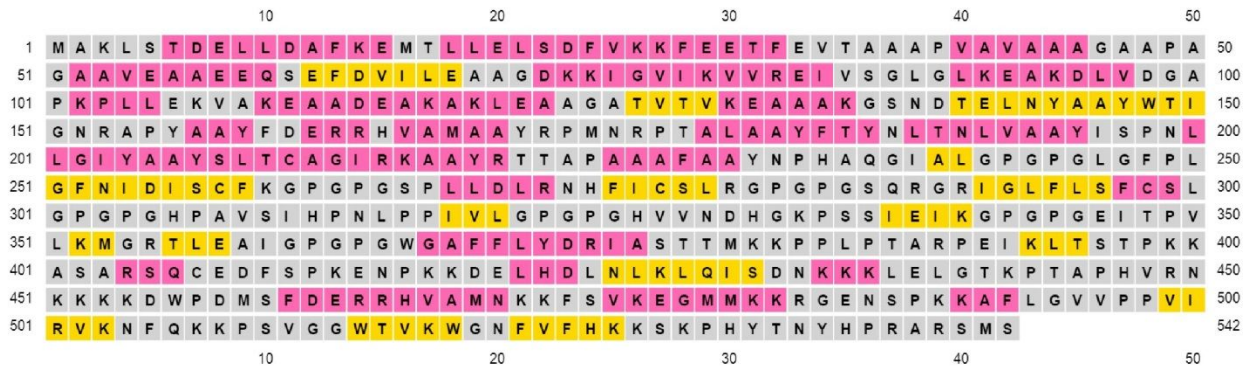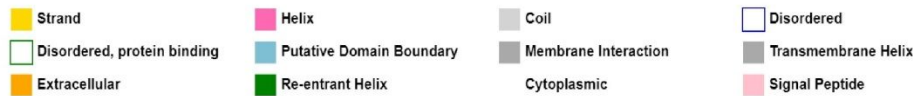

(D)

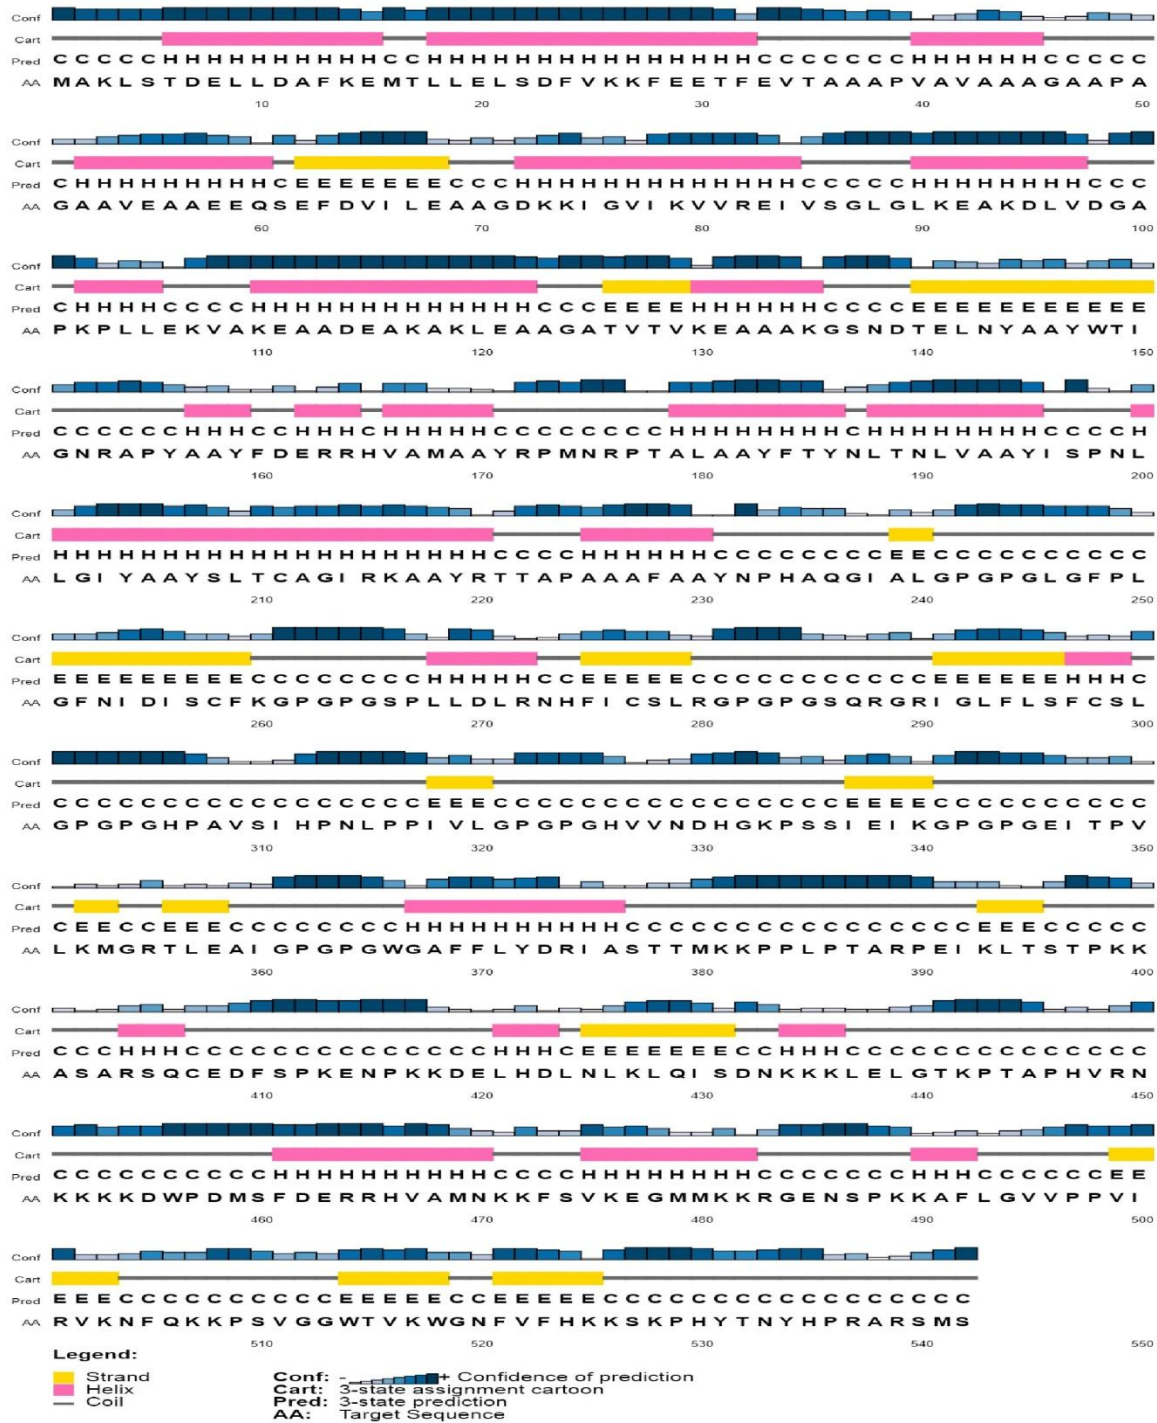

(E)

**Figure S4:** (A) Solubility prediction of the vaccine protein by Protein-Sol server, (B) Composition of the secondary structure from amino acid residues of vaccine construct; (C) Predicted secondary structure of vaccine construct by SOPMA server, (D) Predicted secondary structure of vaccine construct by PSIPRED server, and (E) Predicted cart of the vaccine construct .by PSIPRED server.

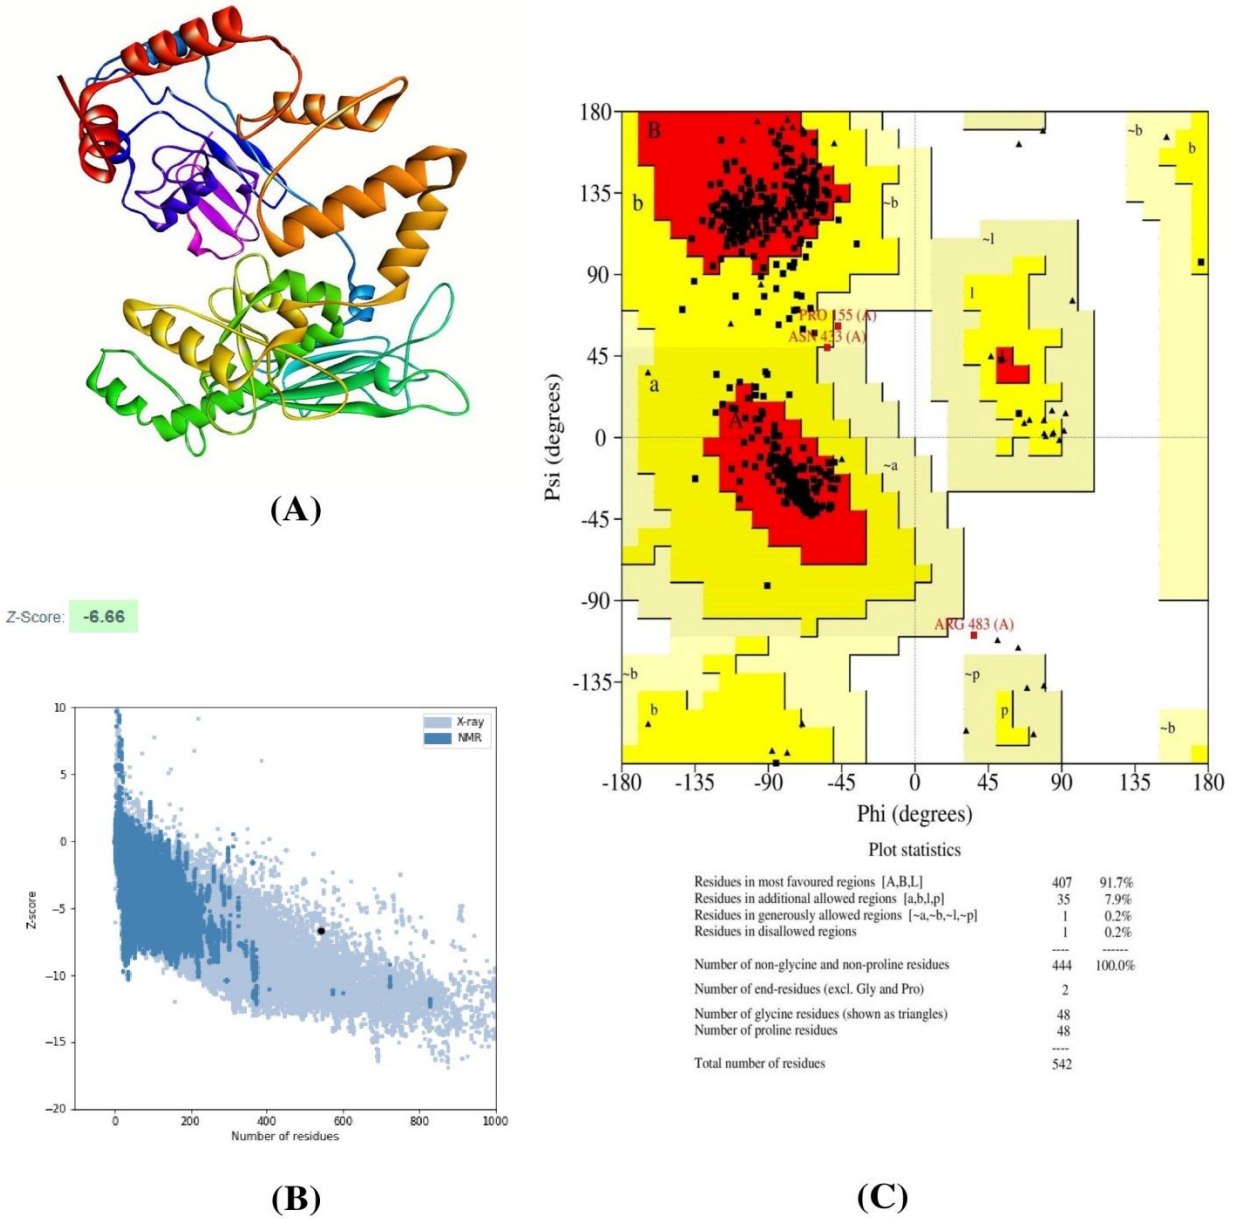

**Figure S5:** (A) 3D structure of the pre-refined vaccine construct, (B) Z-score of the pre-refined vaccine construct predicted by PROSA server, and (C) Ramachandran plot analysis of the pre-refined vaccine construct.
